# Supplementary material
Source: publisher figshare collection journal article supplement (https://gsajournals.figshare.com/ndownloader/files/24974864)
Supplement: Supplementary file 1 [file 24974864]

## Sheet: Table S1 DESeq2_Results_fex2_vs
Table S1. A list of differentially expressed genes from comparing the transcriptome of cells cultured in M3 + 2.5% FEx to the transcriptome of control cells.
ENSEMBL_ID	Geneid	log2FoldChange	pvalue	padj
FBgn0039759	CG9733	8.71032	2.03047e-13	3.83014e-12
FBgn0000277	CecA2	8.21018	1.11212e-96	2.14818e-94
FBgn0041581	AttB	8.18654	2.04937e-102	4.12351e-100
FBgn0012042	AttA	8.16238	3.56207e-42	2.27831e-40
FBgn0283461	Drs	7.66566	0	0
FBgn0032629	beat-IIIc	7.47494	4.0016e-10	5.52896e-09
FBgn0000276	CecA1	7.31107	0	0
FBgn0043575	PGRP-SC2	7.15976	6.89783e-09	8.13421e-08
FBgn0034407	DptB	7.05017	1.99231e-94	3.70034e-92
FBgn0014865	Mtk	6.85343	7.28356e-44	5.02462e-42
FBgn0052185	edin	6.75302	1.2149e-262	9.77793e-260
FBgn0037126	CG14567	6.50409	1.38291e-112	3.42465e-110
FBgn0033250	CG14762	6.18747	7.57245e-07	6.41532e-06
FBgn0039108	CG10232	6.12565	2.82095e-269	2.47679e-266
FBgn0041579	AttC	6.12502	2.00754e-06	1.58147e-05
FBgn0035452	CG10359	6.11044	3.4564e-153	1.45139e-150
FBgn0262881	CG43236	6.09558	1.71029e-33	8.09706e-32
FBgn0032810	CG13077	5.99561	1.23837e-08	1.39071e-07
FBgn0030847	CG12991	5.82156	5.94623e-38	3.22633e-36
FBgn0032025	CG7778	5.79961	1.89784e-47	1.47817e-45
FBgn0060296	pain	5.73987	6.24647e-78	9.88991e-76
FBgn0038071	Dtg	5.55258	0	0
FBgn0053225	CG33225	5.52267	1.22022e-19	3.60394e-18
FBgn0010388	Dro	5.50187	1.00032e-15	2.27319e-14
FBgn0000278	CecB	5.49343	6.96421e-53	6.34531e-51
FBgn0038070	CG6753	5.48558	1.98745e-05	0.00012952
FBgn0033949	Had2	5.42874	6.17689e-07	5.36478e-06
FBgn0002576	lz	5.35303	1.24218e-05	8.47386e-05
FBgn0000179	bi	5.33083	1.16344e-09	1.50624e-08
FBgn0025879	Timp	5.30544	1.48107e-34	7.26099e-33
FBgn0027584	CG4757	5.2902	1.62802e-05	0.000108065
FBgn0037128	CG14572	5.26017	7.33479e-05	0.00041892
FBgn0002922	nau	5.19863	4.65233e-12	7.70706e-11
FBgn0035711	CG8519	5.17462	1.67656e-06	1.34599e-05
FBgn0037906	PGRP-LB	4.97185	7.73173e-42	4.88059e-40
FBgn0038530	AttD	4.95493	4.15203e-283	5.01254e-280
FBgn0001147	gsb-n	4.82831	0.0019249	0.00728761
FBgn0030160	CG9691	4.80287	1.18501e-07	1.16417e-06
FBgn0042086	Tsp42Eb	4.73141	0.000390613	0.00182955
FBgn0085407	Pvf3	4.69172	1.71767e-273	1.65893e-270
FBgn0266758	Esyt2	4.66625	2.6614e-155	1.22399e-152
FBgn0036715	Cad74A	4.63518	0.00107053	0.00440529
FBgn0039495	CG5909	4.63438	0.000606608	0.00267762
FBgn0031734	CG11147	4.60896	1.32503e-11	2.08181e-10
FBgn0032601	yellow-b	4.49923	4.76798e-38	2.63138e-36
FBgn0030998	CG14195	4.46453	0.00157855	0.00614993
FBgn0039326	CG10562	4.45209	0.000114385	0.000616826
FBgn0037594	Or85d	4.42767	0.00228031	0.00839619
FBgn0034655	CG10307	4.42728	0.00131062	0.00525226
FBgn0259989	CG42486	4.41567	5.81998e-07	5.08222e-06
FBgn0259730	tal-1A	4.4106	0.00066226	0.00288503
FBgn0259731	tal-2A	4.4106	0.00066226	0.00288503
FBgn0259732	tal-3A	4.4106	0.00066226	0.00288503
FBgn0259733	tal-AA	4.4106	0.00066226	0.00288503
FBgn0035623	mthl2	4.39778	5.74765e-156	2.77554e-153
FBgn0040968	CG14933	4.39497	6.7292e-07	5.76158e-06
FBgn0036479	CG13458	4.39107	1.18288e-06	9.69803e-06
FBgn0034139	CG4927	4.37847	2.22742e-112	5.3781e-110
FBgn0035797	CG14837	4.30758	0.000143127	0.000752898
FBgn0000527	e	4.26899	1.26495e-06	1.02922e-05
FBgn0031032	CG14204	4.26299	0.000187113	0.000952627
FBgn0031471	CG3117	4.25286	1.16561e-09	1.50703e-08
FBgn0052373	CG32373	4.23679	4.81849e-22	1.58829e-20
FBgn0003429	slo	4.23206	9.64159e-05	0.00053241
FBgn0039099	GILT2	4.19811	5.12826e-17	1.27651e-15
FBgn0033136	Tsp42Eo	4.19801	0.000103237	0.000562619
FBgn0036461	Zip71B	4.19391	0.000180071	0.000921635
FBgn0051199	CG31199	4.18938	0.00253158	0.00918139
FBgn0036287	CG10663	4.17609	1.23492e-17	3.20614e-16
FBgn0286929	CG46426	4.16963	2.7104e-06	2.09249e-05
FBgn0046874	Pif1B	4.16112	5.31852e-38	2.90205e-36
FBgn0263980	Stacl	4.15921	1.4959e-20	4.64547e-19
FBgn0261258	rgn	4.13333	0	0
FBgn0261015	Pif1A	4.1136	4.56035e-38	2.53126e-36
FBgn0050104	NT5E-2	4.10884	2.07862e-21	6.58208e-20
FBgn0000636	Fas3	4.07069	5.60073e-23	1.91815e-21
FBgn0030778	CG4678	4.05192	0.00226087	0.00834053
FBgn0033326	CG14743	4.05109	0.00909857	0.0274778
FBgn0052843	Dh31-R	4.05001	0.00585359	0.0189203
FBgn0038342	B9d1	4.04682	0.00461547	0.0153923
FBgn0036627	Gagr	4.04633	0.00577213	0.0187071
FBgn0032613	Nepl9	4.04631	0.0143639	0.0402339
FBgn0003255	rk	4.04404	0.000156354	0.000810992
FBgn0027843	CAH2	4.04282	4.31261e-10	5.93322e-09
FBgn0054034	CG34034	4.01853	1.40003e-58	1.40849e-56
FBgn0039852	nyo	4.01445	2.99332e-05	0.000187117
FBgn0283437	PPO1	4.00191	1.3438e-17	3.47017e-16
FBgn0259977	Tdc1	3.94657	0.00398115	0.0135244
FBgn0031031	CG14218	3.9284	5.36587e-14	1.07073e-12
FBgn0038088	CG10126	3.91604	0	0
FBgn0051719	RluA-1	3.90499	2.50418e-10	3.54105e-09
FBgn0263081	CG43349	3.90349	0.00629045	0.0201169
FBgn0266442	CG45072	3.90279	0.00582303	0.0188342
FBgn0039536	unc80	3.8996	0.0201492	0.0533737
FBgn0041623	Or65c	3.89891	0.0105766	0.031067
FBgn0039747	AdoR	3.86133	1.11519e-14	2.33634e-13
FBgn0030051	spirit	3.85207	0.00366019	0.0126296
FBgn0032666	CG5758	3.82935	2.17627e-61	2.33538e-59
FBgn0263118	tx	3.82228	9.32544e-14	1.82318e-12
FBgn0004858	elB	3.80644	1.8073e-06	1.44017e-05
FBgn0052181	CG32181	3.76542	0.00392467	0.013356
FBgn0032798	CG10132	3.76112	2.40843e-80	3.94248e-78
FBgn0050160	CG30160	3.73554	0.0118163	0.0341287
FBgn0032772	CG17350	3.73257	2.58594e-06	2.00442e-05
FBgn0002945	nkd	3.73224	3.09333e-36	1.60621e-34
FBgn0263080	CG43348	3.72936	0.00777293	0.024015
FBgn0038282	dpr9	3.7287	0.0111155	0.0324037
FBgn0026398	Or22a	3.72854	0.036863	0.0872392
FBgn0037956	CG6959	3.67972	1.90585e-15	4.23143e-14
FBgn0051219	CG31219	3.6791	1.61712e-24	5.93844e-23
FBgn0050377	CG30377	3.67877	4.97522e-24	1.77309e-22
FBgn0036094	CG14153	3.67645	0.00619005	0.0198814
FBgn0052026	CG32026	3.67234	0.00520708	0.0171015
FBgn0031547	Sr-CIV	3.63529	0.000146842	0.000767426
FBgn0051361	dpr17	3.57532	0.00578279	0.0187232
FBgn0032422	atilla	3.57508	0.00486091	0.0161052
FBgn0039789	CG9717	3.5702	5.91448e-32	2.70721e-30
FBgn0261989	CG42807	3.56844	0.00189956	0.00720849
FBgn0015872	Drip	3.56585	2.987e-17	7.51263e-16
FBgn0036742	CG7497	3.56441	1.40879e-11	2.20878e-10
FBgn0033958	jef	3.55626	1.10363e-50	9.51685e-49
FBgn0284244	l(2)k05911	3.54421	0.0348419	0.083396
FBgn0003162	Pu	3.5392	2.2181e-33	1.045e-31
FBgn0038531	CG14325	3.5381	0.0205061	0.0540525
FBgn0031902	Wnt6	3.53592	0.0150549	0.04189
FBgn0260000	CG17570	3.53544	0.0319761	0.0777505
FBgn0026392	Or33a	3.53483	0.0234785	0.0603775
FBgn0261529	ms(2)34Fe	3.53265	0.0293497	0.0724404
FBgn0262569	CG43109	3.53222	0.0387977	0.0910591
FBgn0026438	Eaat2	3.5295	0.0249667	0.0634048
FBgn0030340	CG15740	3.51266	6.63433e-45	4.89117e-43
FBgn0031058	CG14227	3.49857	5.01379e-23	1.7294e-21
FBgn0030357	Sclp	3.4855	1.22072e-06	9.96592e-06
FBgn0005771	noc	3.46525	0.000261429	0.00128428
FBgn0031811	CG13982	3.41568	2.53639e-06	1.97315e-05
FBgn0033649	pyr	3.41077	1.01282e-25	3.92844e-24
FBgn0012037	Ance	3.40958	6.36171e-12	1.03786e-10
FBgn0027556	CG4928	3.40426	2.96345e-19	8.62077e-18
FBgn0034999	Fatp3	3.40324	1.58792e-33	7.55473e-32
FBgn0033880	CG6553	3.38461	1.3511e-31	6.15515e-30
FBgn0085460	CG34431	3.36908	4.41497e-08	4.60472e-07
FBgn0038213	CG9624	3.35492	0.020038	0.0531748
FBgn0053462	CG33462	3.35458	0.0154475	0.0427606
FBgn0034725	CG6044	3.35202	5.611e-07	4.91752e-06
FBgn0039396	CCAP-R	3.35055	0.0149808	0.0417078
FBgn0035587	Gdap1	3.33393	0.00029054	0.00141576
FBgn0028514	CG4793	3.32305	1.93153e-117	5.48667e-115
FBgn0030846	CG12992	3.32261	0.00368298	0.0126765
FBgn0259211	grh	3.32126	0.0493716	0.110942
FBgn0020429	GluRIIB	3.31908	0.0532418	0.117889
FBgn0036659	CG9701	3.31273	0.0421514	0.097532
FBgn0033321	CG8738	3.31269	0.0344082	0.0826243
FBgn0031472	CG2983	3.30796	0.0502135	0.112433
FBgn0027544	CG2217	3.30088	3.14887e-57	3.0719e-55
FBgn0261704	CG42740	3.30088	3.14887e-57	3.0719e-55
FBgn0004240	DptA	3.29564	9.89554e-05	0.000543045
FBgn0031762	CG9098	3.28779	0.000316291	0.00152508
FBgn0036552	CG17028	3.27331	0.00519232	0.0170628
FBgn0038214	CG9616	3.226	0.0248534	0.0631668
FBgn0031299	CG4629	3.21567	7.91634e-20	2.36706e-18
FBgn0032484	kek4	3.20297	0.00545155	0.0177755
FBgn0262808	CG43179	3.20296	0.000502633	0.00227253
FBgn0266756	btsz	3.15336	5.62058e-10	7.62409e-09
FBgn0034909	CG4797	3.14705	0.00118347	0.00480454
FBgn0039827	CG1544	3.1453	4.62553e-36	2.37624e-34
FBgn0031327	CG5397	3.14296	1.10862e-25	4.26577e-24
FBgn0038492	Mur89F	3.12523	0.000315312	0.00152188
FBgn0053329	Sp212	3.12517	9.38149e-117	2.51685e-114
FBgn0050460	CG30460	3.09524	2.03893e-53	1.89346e-51
FBgn0032857	CG10947	3.09226	0.0198376	0.0527444
FBgn0038653	Octalpha2R	3.0912	0.0351454	0.0840599
FBgn0003944	Ubx	3.08575	0.0363888	0.0863073
FBgn0265576	CG44403	3.05717	0.11441	0.216962
FBgn0034903	sona	3.05709	0.0700347	0.14701
FBgn0050101	Vajk4	3.05685	0.0986024	0.193204
FBgn0262880	CG43235	3.05641	0.058177	0.126548
FBgn0250910	Octbeta3R	3.05342	0.0665895	0.141035
FBgn0028699	Rh50	3.05084	0.127836	0.236975
FBgn0036440	CG17177	3.05005	0.0607584	0.130954
FBgn0034045	CG8249	3.04998	0.0648813	0.137992
FBgn0032684	Ugt301D1	3.04872	0.0748721	0.154876
FBgn0259923	2020-09-04	3.04297	7.39868e-26	2.89297e-24
FBgn0259175	ome	3.04195	2.25713e-149	9.08307e-147
FBgn0033710	CG17739	3.03012	2.52424e-10	3.5642e-09
FBgn0259821	CG42402	3.02704	9.25841e-08	9.24692e-07
FBgn0004919	gol	3.01859	4.93348e-71	6.35301e-69
FBgn0035246	CG13928	3.0138	2.09044e-08	2.26593e-07
FBgn0042106	CG18754	2.98287	4.41873e-07	3.95515e-06
FBgn0034143	CG8303	2.9772	0.022951	0.0592677
FBgn0031470	CG18557	2.97323	5.31526e-274	5.70387e-271
FBgn0259714	DIP-epsilon	2.96433	1.20667e-07	1.18075e-06
FBgn0036877	CG9452	2.96321	3.64951e-07	3.29719e-06
FBgn0034194	CG15611	2.94078	5.83168e-63	6.54911e-61
FBgn0033982	Cyp317a1	2.94007	0.0410341	0.0952661
FBgn0010389	htl	2.93779	0.0618386	0.132808
FBgn0036205	CG14131	2.93683	0.0692561	0.145756
FBgn0040514	CG17169	2.93486	0.0575047	0.125368
FBgn0031791	AANATL2	2.93395	0.00199456	0.00748765
FBgn0050440	CG30440	2.92452	2.96499e-20	9.0334e-19
FBgn0266405	CG45045	2.92338	0.000116293	0.000625713
FBgn0032139	CG13116	2.8741	1.16775e-06	9.5821e-06
FBgn0004359	T48	2.86569	7.95038e-199	5.11899e-196
FBgn0264815	Pde1c	2.84962	8.07909e-06	5.69546e-05
FBgn0036116	CG7888	2.83118	5.64561e-97	1.11276e-94
FBgn0038897	CG5849	2.82879	3.15417e-06	2.40814e-05
FBgn0085376	CG34347	2.82876	3.00631e-14	6.11261e-13
FBgn0063649	CG6006	2.82831	4.53601e-120	1.36903e-117
FBgn0036419	CG13482	2.82012	2.71483e-06	2.09424e-05
FBgn0034145	CG5065	2.81791	4.9639e-11	7.46749e-10
FBgn0266492	SclB	2.81325	3.69648e-32	1.70816e-30
FBgn0266491	SclA	2.8019	4.47565e-32	2.05837e-30
FBgn0034723	CG13506	2.7936	3.9642e-13	7.30653e-12
FBgn0038720	CG6231	2.78334	3.39221e-108	7.80047e-106
FBgn0030592	CG9514	2.77958	0.0240842	0.0615846
FBgn0054025	CG34025	2.77847	0.0238189	0.0610519
FBgn0038818	Nep4	2.77094	0.0432437	0.0996297
FBgn0024315	Picot	2.7705	1.31767e-09	1.6923e-08
FBgn0053109	CG33109	2.7701	0.0552526	0.121611
FBgn0000320	eya	2.7684	0.0729189	0.15155
FBgn0053288	CG33288	2.76701	0.0532083	0.117889
FBgn0261509	haf	2.76694	0.0768265	0.158072
FBgn0052507	CG32507	2.7667	0.0793534	0.162269
FBgn0042630	Sox21b	2.766	0.0753538	0.155639
FBgn0032115	CG4438	2.766	0.0756728	0.156131
FBgn0004644	hh	2.76521	0.0398333	0.0930375
FBgn0002838	ms(3)K81	2.76422	0.0792938	0.162215
FBgn0025525	bab2	2.75348	6.47771e-49	5.25729e-47
FBgn0031080	CG12655	2.73935	0.134236	0.246239
FBgn0033447	dila	2.73266	0.108913	0.20879
FBgn0086265	psd	2.73153	0.114201	0.216697
FBgn0262570	CG43110	2.73043	1.02806e-17	2.71285e-16
FBgn0037153	olf413	2.72899	2.65052e-51	2.34851e-49
FBgn0264296	CG43774	2.72755	0.106629	0.205184
FBgn0039667	FipoQ	2.72608	0.106147	0.204461
FBgn0035265	PIG-Wb	2.72315	0.166057	0.289753
FBgn0033981	Cyp6a21	2.71328	0.000131111	0.000698052
FBgn0000547	ed	2.71044	1.33432e-46	1.01471e-44
FBgn0262508	CG43078	2.70924	2.54e-06	1.97315e-05
FBgn0003132	Pp1-13C	2.70125	1.94122e-07	1.8291e-06
FBgn0037238	CG1090	2.67938	0.026916	0.0675031
FBgn0261612	CngA	2.67936	0.000682197	0.00295721
FBgn0039927	CG11155	2.6599	8.90424e-48	6.99164e-46
FBgn0033919	CG8547	2.63714	1.20345e-120	3.74934e-118
FBgn0038740	CG4562	2.61918	1.69856e-09	2.1642e-08
FBgn0015576	alpha-Est8	2.6154	4.28108e-08	4.47475e-07
FBgn0261628	CG42711	2.61281	0.021647	0.0564739
FBgn0035806	PGRP-SD	2.60123	1.07609e-63	1.2227e-61
FBgn0052170	CG32170	2.59589	2.37136e-36	1.25151e-34
FBgn0039844	CG1607	2.59056	7.1969e-22	2.34823e-20
FBgn0025836	RhoGAP1A	2.59038	1.39443e-09	1.78849e-08
FBgn0040843	CG15213	2.58139	0.120439	0.226163
FBgn0025835	CG17707	2.5798	0.0847029	0.171071
FBgn0085424	nub	2.57476	0.0722164	0.150511
FBgn0028496	CG30116	2.57295	0.104227	0.201568
FBgn0053552	CG33552	2.5682	0.0498172	0.111736
FBgn0085408	Shrm	2.54417	2.61763e-11	4.01287e-10
FBgn0038072	CG6225	2.53786	0.0210229	0.0552198
FBgn0052811	CG32811	2.53385	1.13639e-08	1.29121e-07
FBgn0260006	drd	2.52702	0.00419105	0.014143
FBgn0034739	CG3927	2.51178	4.67187e-05	0.00027956
FBgn0000395	cv-2	2.50587	9.95434e-170	5.34106e-167
FBgn0031389	CG4259	2.4713	5.21872e-23	1.79368e-21
FBgn0262624	Tmhs	2.46965	0.0196491	0.0523506
FBgn0027844	CAH1	2.46561	0.0450076	0.102957
FBgn0031888	Pvf2	2.45027	4.88249e-154	2.14341e-151
FBgn0052192	CG32192	2.44056	0.0169391	0.0462272
FBgn0033446	CG1648	2.43732	5.17062e-07	4.57306e-06
FBgn0039413	CG14556	2.43412	1.9965e-09	2.51397e-08
FBgn0032297	CG17124	2.43036	5.83515e-30	2.51589e-28
FBgn0052521	CG32521	2.42644	2.59433e-178	1.47388e-175
FBgn0034647	pirk	2.42401	2.36017e-199	1.62818e-196
FBgn0037386	CG1208	2.41066	0.00160023	0.00621683
FBgn0011589	Elk	2.40288	0.0124837	0.0357981
FBgn0035171	CG12502	2.40102	0.0066848	0.021147
FBgn0004242	Syt1	2.38832	0.00199711	0.00749341
FBgn0261631	CG42714	2.38711	7.60249e-06	5.40286e-05
FBgn0013771	Cyp6a9	2.38542	7.42129e-19	2.1143e-17
FBgn0051038	CG31038	2.38095	6.35065e-41	3.9317e-39
FBgn0262595	CheA56a	2.36703	0.027084	0.0678189
FBgn0032785	CG10026	2.36118	5.04025e-42	3.20255e-40
FBgn0004108	Nrt	2.3573	4.89926e-74	6.85754e-72
FBgn0031957	TwdlE	2.35492	0.170906	0.296553
FBgn0263988	Dic61B	2.35354	0.122918	0.229975
FBgn0051706	CG31706	2.35279	0.127043	0.235913
FBgn0039023	Nepl14	2.35279	0.125586	0.233702
FBgn0015766	Msr-110	2.35277	0.109175	0.209137
FBgn0002842	sa	2.34863	0.157279	0.2779
FBgn0035273	CG12020	2.34755	0.161727	0.284562
FBgn0052819	CG32819	2.34752	0.0714641	0.149232
FBgn0051019	CG31019	2.34642	0.156966	0.277652
FBgn0038165	Task6	2.34466	0.180808	0.309064
FBgn0040089	meso18E	2.34067	6.41484e-13	1.1602e-11
FBgn0039467	CG14253	2.32948	4.26162e-115	1.1124e-112
FBgn0029568	CG11381	2.32768	0.0578447	0.125967
FBgn0035234	CG12003	2.31457	0.188369	0.319225
FBgn0037486	CG14605	2.31316	0.190509	0.321611
FBgn0052572	CG32572	2.31293	0.215185	0.352401
FBgn0050203	CG30203	2.31096	0.165718	0.289266
FBgn0040250	Ugt304A1	2.31012	0.186999	0.31735
FBgn0032264	Lip4	2.3057	4.41546e-13	8.10732e-12
FBgn0265052	St3	2.3051	1.61019e-12	2.79699e-11
FBgn0015522	olf186-M	2.29755	6.02513e-13	1.09381e-11
FBgn0036153	CG7573	2.29072	0.000296148	0.00144018
FBgn0051163	SKIP	2.29066	2.65758e-12	4.49924e-11
FBgn0033214	CG1941	2.28967	0.0345418	0.0829038
FBgn0050148	CG30148	2.28792	0.0269997	0.0676779
FBgn0040503	CG7763	2.28344	0.000530707	0.00238066
FBgn0083974	CG34138	2.27995	0.0272683	0.0682272
FBgn0284229	CG46313	2.27147	1.42418e-133	5.09435e-131
FBgn0045980	niki	2.26555	9.48275e-49	7.63204e-47
FBgn0260660	Mp	2.26177	9.43252e-05	0.000521461
FBgn0034005	ItgaPS4	2.25803	3.76922e-47	2.91225e-45
FBgn0036620	CG4842	2.25405	0.00189842	0.00720715
FBgn0034406	Jheh3	2.25315	1.15823e-08	1.31293e-07
FBgn0052679	CG32679	2.24905	0.0028494	0.0101886
FBgn0259245	DIP-beta	2.24746	0.000738912	0.0031605
FBgn0265413	CG44325	2.24159	4.04066e-85	6.9687e-83
FBgn0085387	shakB	2.24107	5.53139e-07	4.85215e-06
FBgn0260746	Ect3	2.23341	5.8487e-25	2.19793e-23
FBgn0032602	ppk17	2.22973	4.59832e-08	4.78562e-07
FBgn0040028	CG17450	2.21314	0.112538	0.214208
FBgn0031756	CG13992	2.20973	0.0861836	0.173358
FBgn0040299	Myo28B1	2.20683	2.1511e-12	3.70327e-11
FBgn0031169	CG1494	2.20487	4.78738e-12	7.89019e-11
FBgn0029898	CG14439	2.20232	0.0773375	0.158853
FBgn0034221	CG10764	2.19745	5.52867e-43	3.70805e-41
FBgn0032851	CG13970	2.19321	0.0700031	0.146976
FBgn0035146	CG13893	2.1925	8.07116e-104	1.69459e-101
FBgn0054033	CG34033	2.1915	0.00232419	0.00854473
FBgn0086368	tw	2.19006	0.108552	0.208262
FBgn0035710	SP1173	2.18836	3.87183e-38	2.16151e-36
FBgn0004512	Mdr49	2.18255	4.33366e-12	7.19149e-11
FBgn0262794	CG43175	2.18207	6.99981e-91	1.22917e-88
FBgn0029508	Tsp42Ea	2.17132	1.67325e-165	8.50541e-163
FBgn0085412	kmr	2.16874	5.64759e-08	5.82117e-07
FBgn0034733	CG4752	2.16856	2.30763e-37	1.24509e-35
FBgn0031469	CG18558	2.16678	0.000160109	0.000828246
FBgn0265726	Nna1	2.15357	6.61331e-17	1.63998e-15
FBgn0262679	CG43149	2.1522	0.00520766	0.0171015
FBgn0264975	Nrg	2.15165	6.70145e-76	9.80646e-74
FBgn0031518	CG3277	2.14983	5.55286e-05	0.000329218
FBgn0034396	CG15097	2.13986	2.87751e-113	7.31341e-111
FBgn0262983	CG43291	2.13922	5.40441e-06	3.96625e-05
FBgn0041087	wun2	2.13378	6.43386e-44	4.53564e-42
FBgn0030326	CG2444	2.13349	0.023889	0.0611826
FBgn0024150	Ac78C	2.13346	1.27522e-19	3.7549e-18
FBgn0034602	Lapsyn	2.12744	0.000317825	0.00153095
FBgn0259224	CG42324	2.12451	3.99916e-64	4.65348e-62
FBgn0020248	stet	2.12292	6.67769e-13	1.20323e-11
FBgn0031196	Cluap1	2.12017	0.00324703	0.0113994
FBgn0064227	Rdh	2.11645	0.0869743	0.174636
FBgn0038595	CG7142	2.11057	7.14726e-40	4.18353e-38
FBgn0034724	babos	2.1007	5.39792e-35	2.67349e-33
FBgn0003326	sca	2.09866	0.191912	0.323583
FBgn0035577	CG13708	2.09749	0.176712	0.303897
FBgn0083972	CG34136	2.09683	0.0530571	0.117691
FBgn0015609	CadN	2.09513	0.0477499	0.108113
FBgn0263973	jv	2.09321	0.243384	0.385851
FBgn0014073	Tie	2.09133	0.185689	0.315848
FBgn0004580	Cbp53E	2.09066	0.225432	0.364667
FBgn0050044	s-cup	2.09045	0.188603	0.319398
FBgn0038179	CG9312	2.09028	3.34302e-25	1.27114e-23
FBgn0003390	shf	2.08991	1.22653e-08	1.37902e-07
FBgn0040257	Ugt302E1	2.08953	0.188762	0.319555
FBgn0035815	Snmp2	2.08824	0.2012	0.335645
FBgn0031908	CG5177	2.0874	0.192083	0.323721
FBgn0035733	CG8641	2.08444	0.190202	0.321261
FBgn0041181	Tep3	2.08272	0.207507	0.342933
FBgn0000153	b	2.07998	0.0102428	0.0302709
FBgn0040350	CG3690	2.06781	0.163033	0.285801
FBgn0045852	ham	2.06206	8.1005e-07	6.84468e-06
FBgn0087007	bbg	2.05307	2.35879e-17	5.97931e-16
FBgn0036427	CG4613	2.05193	0.0123759	0.0355099
FBgn0033065	Cyp6w1	2.04574	0.0411345	0.0954764
FBgn0015600	toc	2.04217	2.68496e-41	1.67299e-39
FBgn0262475	bru2	2.04068	0.000752478	0.00321
FBgn0035557	CG11353	2.04012	0.138645	0.25241
FBgn0039124	tbrd-1	2.0397	0.114658	0.217387
FBgn0052091	CG32091	2.03939	1.16969e-08	1.32282e-07
FBgn0041182	Tep2	2.03388	5.5273e-74	7.6261e-72
FBgn0259196	CG42300	2.03293	2.34892e-18	6.44486e-17
FBgn0032129	jp	2.0329	0.120823	0.226672
FBgn0036485	FucTA	2.02325	1.76056e-21	5.59326e-20
FBgn0262057	Spn77Ba	2.02203	9.83978e-42	6.17095e-40
FBgn0066101	LpR1	2.02185	2.91666e-07	2.67259e-06
FBgn0015774	NetB	2.01626	9.25944e-10	1.2167e-08
FBgn0020299	stumps	2.01544	0.0223858	0.0580565
FBgn0033397	Cyp4p3	2.01458	0.0001101	0.000594715
FBgn0259682	Jabba	2.00826	0.0153114	0.0424935
FBgn0039644	rdog	2.00673	7.65441e-109	1.80308e-106
FBgn0011695	EbpIII	2.00403	0.0440286	0.1011
FBgn0000024	Ace	2.00228	7.48287e-08	7.55958e-07
FBgn0030895	CG7135	2.00045	0.0674796	0.142577
FBgn0035049	Mmp1	2.00043	1.53861e-48	1.22809e-46
FBgn0031735	CG11029	1.99295	0.0781303	0.160277
FBgn0040351	CG11638	1.99162	2.88292e-107	6.328e-105
FBgn0259163	CG42268	1.99011	4.34327e-16	1.01567e-14
FBgn0261555	CG42673	1.98778	0.000875435	0.0036889
FBgn0037487	thw	1.98608	0.199773	0.333866
FBgn0035694	CG13299	1.97975	0.00636377	0.0203111
FBgn0262123	l(2)41Ab	1.97802	2.62829e-07	2.43142e-06
FBgn0003423	slgA	1.96694	2.17615e-134	8.08357e-132
FBgn0259736	CG42390	1.96029	4.37057e-126	1.50754e-123
FBgn0032683	kon	1.9597	3.40063e-06	2.58998e-05
FBgn0022355	Tsf1	1.92996	0.00586281	0.0189438
FBgn0003028	ovo	1.92559	0.00393819	0.0133879
FBgn0040271	Sulf1	1.91723	1.23766e-125	4.12182e-123
FBgn0063498	GstE2	1.91275	2.86794e-54	2.68918e-52
FBgn0064237	Idgf5	1.90922	5.4513e-79	8.77478e-77
FBgn0063499	GstE10	1.90446	2.6115e-59	2.65493e-57
FBgn0051014	PH4alphaSG1	1.8984	0.223699	0.362767
FBgn0016976	stnA	1.8945	1.90625e-84	3.17423e-82
FBgn0016975	stnB	1.8945	1.90625e-84	3.17423e-82
FBgn0051116	ClC-a	1.89233	3.84566e-09	4.71337e-08
FBgn0038156	side-IV	1.88804	0.171967	0.297859
FBgn0051774	fred	1.88787	0.159382	0.280844
FBgn0004569	aos	1.88423	4.31844e-28	1.75981e-26
FBgn0262029	d	1.88412	0.0797688	0.162877
FBgn0031034	CG14205	1.88346	0.197723	0.331127
FBgn0267001	Ten-a	1.88091	0.0299561	0.0736736
FBgn0034162	CG6426	1.88046	0.162371	0.28533
FBgn0264442	ab	1.87969	0.0482331	0.108891
FBgn0001208	Hn	1.87956	0.0900645	0.179794
FBgn0034638	CG10433	1.87926	1.10378e-40	6.79003e-39
FBgn0038652	CG7720	1.87906	5.21169e-24	1.85053e-22
FBgn0047334	BG642312	1.87881	3.76847e-08	3.97335e-07
FBgn0040723	CG5011	1.87473	0.0822726	0.167141
FBgn0261928	CG42795	1.87176	0.0984074	0.192861
FBgn0027376	rha	1.87164	0.114998	0.217817
FBgn0003475	spir	1.86518	7.99823e-65	9.53665e-63
FBgn0032897	CG9336	1.86321	0.164532	0.287716
FBgn0025697	santa-maria	1.86199	0.092005	0.182874
FBgn0263930	dally	1.86062	4.70612e-39	2.68945e-37
FBgn0040364	CG11378	1.85347	9.53668e-22	3.08044e-20
FBgn0037788	CAH7	1.8523	7.18622e-92	1.30952e-89
FBgn0020445	E23	1.85213	5.39263e-10	7.35622e-09
FBgn0259822	Ca-beta	1.84469	0.180154	0.308207
FBgn0027660	blot	1.82641	9.61214e-09	1.10254e-07
FBgn0038975	Nrx-1	1.81761	5.26872e-15	1.12578e-13
FBgn0039155	Kal1	1.80946	9.16673e-43	6.02261e-41
FBgn0003886	alphaTub85E	1.804	0.00117629	0.0047794
FBgn0053099	CG33099	1.79938	0.000166369	0.000856041
FBgn0030927	CG15046	1.7958	0.0313224	0.0765075
FBgn0069973	CG40485	1.78803	0.0498696	0.111827
FBgn0022800	Cad96Ca	1.78587	3.84373e-15	8.34219e-14
FBgn0259246	brp	1.78486	0.00102524	0.0042406
FBgn0266431	CG45061	1.7825	0.334025	0.485261
FBgn0053547	Rim	1.78209	0.00947629	0.0284134
FBgn0011706	rpr	1.777	6.49542e-71	8.25431e-69
FBgn0040359	CG11380	1.77458	0.292362	0.44071
FBgn0031800	CG9497	1.77311	0.343946	0.495623
FBgn0027070	Ugt36E1	1.77245	0.00196827	0.00741401
FBgn0032588	CG5968	1.77175	0.287099	0.435154
FBgn0000056	Adhr	1.7703	0.0274481	0.0685883
FBgn0000055	Adh	1.7703	0.0274481	0.0685883
FBgn0051546	CG31546	1.77029	0.272215	0.418445
FBgn0085459	CG34430	1.77024	1.371e-28	5.76546e-27
FBgn0039244	CG11069	1.77006	0.263111	0.407819
FBgn0264297	CG43775	1.76973	0.304921	0.454956
FBgn0264298	CG43776	1.76973	0.304921	0.454956
FBgn0264299	CG43777	1.76973	0.304921	0.454956
FBgn0029950	CG9657	1.76885	0.246197	0.389225
FBgn0030985	Obp18a	1.76776	1.66336e-38	9.33996e-37
FBgn0037895	CG6723	1.76715	0.260957	0.405784
FBgn0036876	CG9451	1.76705	0.276021	0.42254
FBgn0033320	CG8586	1.76602	0.277246	0.423594
FBgn0030836	CG8664	1.76595	0.282598	0.430291
FBgn0036619	Cpr72Ec	1.76583	0.291441	0.439803
FBgn0030298	Or10a	1.76303	0.299078	0.448384
FBgn0045502	Gr10a	1.76303	0.299078	0.448384
FBgn0039500	CG5984	1.76172	0.35215	0.503612
FBgn0029932	CG4607	1.76146	3.50356e-35	1.75323e-33
FBgn0030078	CG10970	1.76073	0.0160602	0.0442286
FBgn0052814	CG32814	1.75871	8.06426e-22	2.62238e-20
FBgn0025641	DAAM	1.75654	2.20694e-73	3.00206e-71
FBgn0035708	axed	1.75539	8.62804e-09	9.97959e-08
FBgn0039510	CG3339	1.75531	0.033234	0.0802836
FBgn0039313	CG11892	1.75025	9.40174e-09	1.07969e-07
FBgn0266417	ringer	1.74908	1.31963e-07	1.2809e-06
FBgn0038469	CG4009	1.74708	3.30283e-20	9.99961e-19
FBgn0033821	CG10799	1.74394	0.152382	0.271834
FBgn0010238	Lac	1.73357	2.88415e-117	7.95859e-115
FBgn0266708	Cep89	1.73221	0.342585	0.494482
FBgn0028482	bdl	1.73208	0.00965477	0.0288419
FBgn0030544	CG13403	1.73075	0.346548	0.49806
FBgn0034335	GstE1	1.72912	0.0198018	0.0526744
FBgn0052512	CG32512	1.72694	1.73363e-46	1.30808e-44
FBgn0037167	CG11425	1.72622	0.313023	0.463716
FBgn0259918	inaF-B	1.72549	0.162917	0.28577
FBgn0260812	inaF-D	1.72549	0.162917	0.28577
FBgn0028999	nerfin-1	1.72538	0.356809	0.507744
FBgn0031530	Pgant2	1.72441	2.28717e-13	4.29757e-12
FBgn0030653	CG7860	1.72321	1.85409e-05	0.00012132
FBgn0030310	PGRP-SA	1.71699	2.01762e-45	1.49894e-43
FBgn0033644	Tret1-2	1.71516	4.82642e-38	2.6485e-36
FBgn0024897	b6	1.71433	0.0172612	0.0469072
FBgn0038377	CG9632	1.71278	0.341636	0.493571
FBgn0037683	CG18473	1.70798	1.94731e-06	1.53779e-05
FBgn0031554	CG15418	1.70677	0.274313	0.420993
FBgn0029877	CG17717	1.70524	0.257556	0.401918
FBgn0051926	CG31926	1.70084	0.252072	0.395985
FBgn0037534	ELOVL	1.69841	0.230544	0.371285
FBgn0036586	CG13070	1.69783	0.238521	0.380375
FBgn0035308	CG15822	1.69756	0.255091	0.399169
FBgn0033134	Tsp42El	1.69748	1.24049e-06	1.01017e-05
FBgn0036560	CG5895	1.6974	1.21454e-72	1.62918e-70
FBgn0034740	nsr	1.6971	0.228235	0.368179
FBgn0039736	CG7912	1.69677	0.230976	0.371671
FBgn0034440	CG10073	1.69596	0.273661	0.420127
FBgn0286071	AdamTS-A	1.69544	7.22613e-14	1.43012e-12
FBgn0285963	CG46339	1.69469	2.15598e-74	3.06213e-72
FBgn0032048	Dh31	1.69397	0.240627	0.382485
FBgn0263111	cac	1.69367	0.00645804	0.0205528
FBgn0266757	mfr	1.69185	0.237037	0.379059
FBgn0085427	CG34398	1.69122	3.60418e-40	2.16206e-38
FBgn0034706	CG11275	1.6886	6.35454e-06	4.58686e-05
FBgn0001987	Gli	1.6884	3.75317e-13	6.94409e-12
FBgn0005666	bt	1.68349	7.19194e-05	0.000413205
FBgn0264574	Glut1	1.67648	0.000341112	0.00163092
FBgn0020294	ko	1.67539	0.205554	0.340755
FBgn0035563	CG13716	1.67271	0.225374	0.364667
FBgn0036324	CG12520	1.67194	0.0949706	0.187918
FBgn0010473	tutl	1.67179	0.000147248	0.00076913
FBgn0022710	Ac13E	1.67116	3.39366e-16	7.97469e-15
FBgn0035287	CG13937	1.67004	0.214626	0.351868
FBgn0034082	CG10734	1.66965	0.279385	0.426272
FBgn0040827	CG13315	1.66742	4.24706e-06	3.17724e-05
FBgn0039312	CG10514	1.66635	3.8738e-19	1.11349e-17
FBgn0026592	Fie	1.66542	1.23079e-12	2.16521e-11
FBgn0035612	frm	1.66474	0.00154077	0.00602947
FBgn0033124	Tsp42Ec	1.65103	0.0625297	0.134024
FBgn0034200	Gbp2	1.64896	8.61595e-15	1.81687e-13
FBgn0029831	CG5966	1.6466	0.0612449	0.131738
FBgn0036935	CG14186	1.64013	0.211706	0.34779
FBgn0051755	SoYb	1.63939	1.33065e-21	4.24138e-20
FBgn0085399	CG34370	1.634	0.187864	0.318492
FBgn0053121	Spn28Db	1.63257	0.0959743	0.189477
FBgn0011722	Tig	1.62977	2.52077e-62	2.79834e-60
FBgn0001250	if	1.62818	4.16274e-22	1.38157e-20
FBgn0036612	CG4998	1.62722	0.0467807	0.106494
FBgn0029507	Tsp42Ed	1.6269	3.17403e-61	3.29622e-59
FBgn0037916	CG5342	1.62657	0.159069	0.280448
FBgn0034467	CG15128	1.62377	0.137152	0.250399
FBgn0023479	teq	1.61104	5.7383e-40	3.42102e-38
FBgn0038679	CG6040	1.59829	0.000431286	0.00199874
FBgn0039938	Sox102F	1.59634	0.0447904	0.102508
FBgn0038250	CG3505	1.59291	2.4067e-11	3.69537e-10
FBgn0040099	lectin-28C	1.59227	2.11227e-06	1.65856e-05
FBgn0041605	cpx	1.59061	1.03589e-34	5.10442e-33
FBgn0032140	CG13117	1.58945	4.52889e-62	4.97046e-60
FBgn0036551	CG17029	1.58942	2.14276e-10	3.06589e-09
FBgn0032773	fon	1.58852	1.05011e-17	2.76349e-16
FBgn0030260	CG1537	1.58362	6.38002e-05	0.000370971
FBgn0034741	CG4269	1.58232	0.000103474	0.000563333
FBgn0033654	Sobp	1.56605	0.100854	0.1965
FBgn0030615	Cyp4s3	1.56274	0.0719693	0.150125
FBgn0033054	CG14591	1.56067	2.69774e-07	2.48377e-06
FBgn0031689	Cyp28d1	1.55613	1.41062e-05	9.50056e-05
FBgn0034761	CG4250	1.55422	0.000184674	0.000941702
FBgn0264089	sli	1.55153	2.37487e-55	2.27094e-53
FBgn0033980	Cyp6a20	1.54865	1.09816e-46	8.4175e-45
FBgn0262481	CG43071	1.54717	0.0764592	0.157518
FBgn0030928	CG15044	1.54093	0.075547	0.156004
FBgn0016797	fz2	1.53925	3.47692e-68	4.30515e-66
FBgn0051326	CG31326	1.53701	0.00303772	0.0107703
FBgn0034737	CG11362	1.53528	3.14231e-07	2.86576e-06
FBgn0053542	upd3	1.53374	6.04384e-22	1.97869e-20
FBgn0037801	CG3999	1.53134	0.0451315	0.103143
FBgn0013772	Cyp6a8	1.52844	0.0511096	0.114172
FBgn0259227	CG42327	1.52789	1.21337e-13	2.33907e-12
FBgn0039916	Ekar	1.52106	1.15621e-13	2.23333e-12
FBgn0010313	corto	1.52037	0.0194847	0.0520275
FBgn0033874	CG6347	1.51959	0.037333	0.0882
FBgn0035578	CG13707	1.51828	0.00282988	0.0101338
FBgn0032024	CG14273	1.51782	1.55123e-76	2.30489e-74
FBgn0032774	CG17549	1.5116	6.62278e-06	4.76623e-05
FBgn0264494	CG17646	1.50912	6.669e-07	5.72526e-06
FBgn0037553	CG18249	1.50568	5.78032e-25	2.18072e-23
FBgn0033775	Cyp9h1	1.50445	0.000544141	0.00243189
FBgn0050035	Tret1-1	1.50245	2.95838e-34	1.43578e-32
FBgn0032899	CG9338	1.50234	2.89568e-05	0.000181365
FBgn0000279	CecC	1.49769	1.03204e-09	1.35244e-08
FBgn0001085	fz	1.49237	3.0625e-34	1.47888e-32
FBgn0259101	CG42249	1.47876	0.321195	0.472521
FBgn0039098	GILT3	1.47873	1.64093e-16	3.94443e-15
FBgn0051183	CG31183	1.47739	0.273835	0.420327
FBgn0032593	Trpgamma	1.47564	0.327618	0.479705
FBgn0039257	tnc	1.47336	0.294225	0.443034
FBgn0001235	hth	1.47299	0.332288	0.484048
FBgn0040658	CG13516	1.4724	0.326982	0.478991
FBgn0265991	Zasp52	1.47233	3.52186e-53	3.23944e-51
FBgn0032023	CG14274	1.47112	0.277283	0.423594
FBgn0034606	ASPP	1.47069	0.30485	0.454956
FBgn0051721	Trim9	1.46192	0.222919	0.362023
FBgn0039640	CG14516	1.45976	1.93769e-32	9.08456e-31
FBgn0035791	CG8539	1.45937	0.248778	0.392174
FBgn0030575	CG5321	1.45716	0.102672	0.199117
FBgn0262870	axo	1.45702	2.02803e-31	9.19562e-30
FBgn0035019	Ir60e	1.45564	0.345583	0.497207
FBgn0038180	Cht5	1.45448	0.283136	0.430974
FBgn0031292	CG15824	1.45342	0.316857	0.467492
FBgn0263655	CG43646	1.4534	0.0755878	0.156022
FBgn0039332	alrm	1.45029	0.226883	0.366489
FBgn0051869	CG31869	1.44838	0.306607	0.456554
FBgn0034789	PIP5K59B	1.44766	0.0980426	0.19238
FBgn0052055	CG32055	1.44535	0.300461	0.449546
FBgn0033893	CG18371	1.44525	0.133626	0.24554
FBgn0023197	Jon74E	1.44487	0.342007	0.493959
FBgn0265191	Gyg	1.44268	3.52883e-22	1.17522e-20
FBgn0052006	CG32006	1.44203	0.332956	0.4845
FBgn0043791	phu	1.44048	2.52171e-07	2.3418e-06
FBgn0030576	CG15890	1.43963	8.10914e-05	0.000456932
FBgn0036368	CG10738	1.43784	0.00128173	0.00516004
FBgn0040992	CG10570	1.43476	0.289644	0.438066
FBgn0260228	CG42502	1.43476	0.289644	0.438066
FBgn0259195	CG42299	1.43059	9.22808e-06	6.45364e-05
FBgn0034322	CG18536	1.43047	0.000162189	0.000837615
FBgn0004646	ogre	1.42814	0.000796463	0.00338418
FBgn0030614	CG9072	1.42353	0.338824	0.490095
FBgn0033153	Gadd45	1.42256	4.8818e-68	5.96816e-66
FBgn0266084	Fhos	1.41273	2.65156e-44	1.9111e-42
FBgn0039290	CG13654	1.40423	1.0544e-44	7.65665e-43
FBgn0005626	ple	1.39613	0.0513324	0.114602
FBgn0259734	Nost	1.39594	0.000107799	0.00058519
FBgn0027563	CG9631	1.39443	2.238e-12	3.83238e-11
FBgn0034736	gas	1.39281	1.16916e-33	5.58995e-32
FBgn0039758	CG9737	1.38307	0.0452022	0.10328
FBgn0005613	Sox15	1.37984	0.055129	0.121394
FBgn0035348	CG16758	1.37826	4.6568e-05	0.00027883
FBgn0035539	slow	1.378	5.43181e-10	7.38879e-09
FBgn0283471	wupA	1.37625	0.0915538	0.182052
FBgn0038412	Zip89B	1.37289	0.0467065	0.106415
FBgn0259678	sqa	1.3724	0.0895799	0.178992
FBgn0038238	CG14854	1.37128	0.176545	0.303717
FBgn0263397	Ih	1.36906	5.18031e-30	2.24356e-28
FBgn0265274	Inx3	1.36808	1.4712e-05	9.86039e-05
FBgn0051121	CG31121	1.36438	0.452182	0.600711
FBgn0016920	nompC	1.36275	0.140655	0.255588
FBgn0031294	IA-2	1.35875	0.440644	0.589846
FBgn0050418	nord	1.3566	0.400583	0.552491
FBgn0003301	rut	1.35561	3.56071e-61	3.65844e-59
FBgn0029994	Ldsdh1	1.35422	0.446195	0.595561
FBgn0265631	CG44438	1.35279	0.452658	0.601048
FBgn0014859	Hr38	1.35277	0.425538	0.574804
FBgn0031412	CG16995	1.35276	0.41207	0.563069
FBgn0031000	Muc18B	1.35171	0.412789	0.563414
FBgn0024943	PIP82	1.35134	0.447815	0.597128
FBgn0011761	dhd	1.3488	0.482027	0.626739
FBgn0028572	qtc	1.34836	0.00251731	0.00913647
FBgn0085409	smal	1.34756	0.208021	0.343548
FBgn0002930	nec	1.3464	0.428439	0.578075
FBgn0014135	bnl	1.34601	4.2402e-39	2.43761e-37
FBgn0031248	CG11912	1.34575	0.470937	0.617557
FBgn0036654	CG9692	1.34572	0.471478	0.618015
FBgn0043865	SA-2	1.34083	0.062636	0.134192
FBgn0039420	CG6154	1.33755	0.0567948	0.124072
FBgn0030065	CG12075	1.33751	1.14626e-25	4.39308e-24
FBgn0040338	TfIIA-S-2	1.33699	2.12266e-32	9.90368e-31
FBgn0087012	5-HT2A	1.33699	0.188496	0.319326
FBgn0032638	SPH93	1.33216	2.21661e-05	0.000143006
FBgn0051807	CG31807	1.3297	0.170859	0.296524
FBgn0085397	Fili	1.32663	0.168087	0.29266
FBgn0038909	CG6569	1.32624	4.45725e-16	1.03981e-14
FBgn0052214	CG32214	1.32422	0.205019	0.340103
FBgn0287209	Gfat1	1.32416	0.100772	0.19638
FBgn0265180	CG44245	1.32237	0.00145469	0.00573212
FBgn0039593	Sid	1.3212	0.0129128	0.0367989
FBgn0041184	Socs36E	1.31941	3.26274e-77	5.00183e-75
FBgn0053516	dpr3	1.31764	5.10184e-07	4.51637e-06
FBgn0283531	Duox	1.31603	0.034089	0.0820208
FBgn0037521	CG2993	1.31557	0.235181	0.377306
FBgn0002962	nos	1.31204	0.0485797	0.109535
FBgn0036870	CG14095	1.31173	0.00114475	0.00466696
FBgn0004910	Eip63F-1	1.31118	0.0193981	0.0518249
FBgn0031887	Ugt307A1	1.30764	0.285597	0.433462
FBgn0032967	CG1428	1.30689	0.278499	0.425054
FBgn0004893	bowl	1.30134	7.45077e-06	5.30284e-05
FBgn0039078	CG4374	1.29945	0.0231161	0.0595982
FBgn0003463	sog	1.29801	0.0139568	0.0393563
FBgn0030394	Cpr11A	1.29612	0.254186	0.398204
FBgn0013469	klu	1.29493	0.11861	0.223414
FBgn0052694	CG32694	1.29082	0.312176	0.462777
FBgn0037996	CG4830	1.2908	0.274509	0.421128
FBgn0260964	Vmat	1.28867	0.302005	0.451512
FBgn0053465	CG33465	1.28626	0.286563	0.43441
FBgn0264894	CG44085	1.28472	9.05633e-27	3.6143e-25
FBgn0035855	CG7366	1.2844	0.289754	0.438108
FBgn0263390	Nha2	1.28302	0.106474	0.204928
FBgn0010395	Itgbn	1.27998	4.89893e-22	1.60932e-20
FBgn0051313	CG31313	1.27554	0.120209	0.225952
FBgn0041604	dlp	1.27499	9.55627e-20	2.83983e-18
FBgn0031702	fusl	1.27416	0.291996	0.440254
FBgn0026439	Eaat1	1.27066	0.00988872	0.0294134
FBgn0262160	CG9932	1.26978	1.60849e-75	2.31863e-73
FBgn0039411	dysf	1.26414	4.12797e-24	1.47659e-22
FBgn0261565	Lmpt	1.2602	4.00729e-48	3.17233e-46
FBgn0027570	Nep2	1.25944	0.169855	0.29526
FBgn0031181	Ir20a	1.25902	0.00736582	0.0229481
FBgn0085354	CG34325	1.25067	0.00810841	0.0249557
FBgn0260745	mfas	1.24331	6.64406e-11	9.87204e-10
FBgn0027580	PCB	1.24274	6.46851e-25	2.42143e-23
FBgn0033724	CG8501	1.24228	0.000151214	0.000787032
FBgn0010397	LamC	1.24115	3.40921e-14	6.88832e-13
FBgn0038416	CG17930	1.23931	0.0247477	0.0629811
FBgn0011653	mas	1.23673	0.135028	0.247317
FBgn0031866	Nlg2	1.2296	0.466057	0.613491
FBgn0029810	CG12239	1.2267	0.437458	0.586638
FBgn0085446	CG34417	1.2241	2.81955e-44	2.01712e-42
FBgn0051875	CG31875	1.2233	5.63515e-07	4.9342e-06
FBgn0029922	CG14431	1.22293	0.209889	0.345569
FBgn0039064	CG4467	1.22202	0.448091	0.59731
FBgn0011296	l(2)efl	1.22199	0.00443751	0.0148862
FBgn0020377	Sr-CII	1.22156	0.443159	0.592309
FBgn0036235	CG6938	1.21662	0.436128	0.58518
FBgn0010039	GstD3	1.21582	6.96391e-44	4.83867e-42
FBgn0264695	Mhc	1.21575	0.265001	0.410017
FBgn0001321	knk	1.21257	0.251913	0.395928
FBgn0032143	CG4017	1.21239	0.432064	0.581666
FBgn0265089	eIF4E3	1.21225	0.403322	0.554963
FBgn0037408	NPFR	1.21178	0.467288	0.614692
FBgn0085384	CG34355	1.20951	1.28428e-07	1.25036e-06
FBgn0030417	CG15725	1.20919	0.409061	0.560093
FBgn0028704	Nckx30C	1.20781	0.0164892	0.0451524
FBgn0034363	CG5327	1.20634	0.449558	0.59846
FBgn0021767	org-1	1.20604	0.425464	0.574804
FBgn0030432	CG4404	1.20603	0.000707565	0.00305484
FBgn0026403	Ndg	1.20543	0.382461	0.534714
FBgn0035413	CG14958	1.20449	0.410536	0.561309
FBgn0034662	CG13492	1.20396	0.258558	0.403157
FBgn0031568	CG10019	1.20112	0.285721	0.433473
FBgn0000723	FER	1.20065	1.52915e-76	2.30489e-74
FBgn0016123	Alp4	1.1991	0.226195	0.365806
FBgn0086408	stl	1.19827	0.227157	0.366808
FBgn0036319	Ent3	1.19779	0.0481751	0.108824
FBgn0036862	Gbs-76A	1.19732	1.54387e-09	1.97231e-08
FBgn0040505	Alk	1.19645	0.257741	0.402078
FBgn0263400	CG43446	1.19568	0.0230407	0.0594198
FBgn0033115	Spn42De	1.19353	5.3264e-08	5.50488e-07
FBgn0003218	rdgB	1.19293	1.64181e-16	3.94443e-15
FBgn0039611	Nepl18	1.19173	0.272289	0.418486
FBgn0260971	CG42594	1.18846	0.402714	0.554235
FBgn0003996	w	1.18617	0.401184	0.553019
FBgn0267428	DIP-lambda	1.18541	0.00125688	0.00507906
FBgn0260997	CG42598	1.18416	0.130374	0.240755
FBgn0051221	CG31221	1.18407	0.444996	0.594437
FBgn0039343	CG5111	1.18397	1.46721e-17	3.77876e-16
FBgn0050008	CG30008	1.18366	0.438866	0.587976
FBgn0267796	Tmc	1.18098	0.482289	0.626996
FBgn0260004	Snmp1	1.18076	0.42883	0.578424
FBgn0037101	CG7634	1.18049	0.197773	0.331153
FBgn0036575	CG5157	1.17962	6.80538e-08	6.94048e-07
FBgn0001075	ft	1.17893	0.288107	0.436203
FBgn0003979	Vm26Aa	1.17866	0.448773	0.597858
FBgn0261998	CG42816	1.17663	0.16928	0.294419
FBgn0028645	beat-Ib	1.1765	0.474908	0.620863
FBgn0038890	CG7956	1.17593	1.37301e-28	5.76546e-27
FBgn0260943	Rbp6	1.17358	0.16066	0.282839
FBgn0035968	Slc45-1	1.17127	1.67823e-11	2.60585e-10
FBgn0250816	AGO3	1.17025	1.82478e-16	4.34081e-15
FBgn0038042	Scgbeta	1.16915	0.415588	0.566194
FBgn0052681	CG32681	1.16642	1.20543e-06	9.87453e-06
FBgn0266801	CG45263	1.16594	0.0362579	0.0860814
FBgn0013812	Dhc93AB	1.16034	0.428171	0.577956
FBgn0037016	CG13252	1.15997	6.14579e-07	5.35221e-06
FBgn0033033	scaf	1.15835	6.50576e-43	4.33329e-41
FBgn0030904	upd2	1.15568	2.99331e-05	0.000187117
FBgn0029993	CG1571	1.15495	0.478809	0.623983
FBgn0262484	CG43074	1.15416	0.0199063	0.0528899
FBgn0039494	grass	1.15322	1.57531e-16	3.80358e-15
FBgn0036786	skl	1.15152	0.456433	0.604447
FBgn0040842	CG15212	1.15126	0.464448	0.612124
FBgn0034476	Toll-7	1.14208	0.000539027	0.0024135
FBgn0032900	CG14401	1.14181	0.20428	0.339225
FBgn0004509	Fur1	1.14145	6.50306e-40	3.85316e-38
FBgn0262141	CG42867	1.13715	0.144665	0.2613
FBgn0030932	Ggt-1	1.13324	0.0734548	0.152401
FBgn0263109	CG43366	1.12876	0.208177	0.34372
FBgn0020647	KrT95D	1.12805	2.92007e-121	9.40069e-119
FBgn0024361	Tsp2A	1.12572	0.00134394	0.00536121
FBgn0029830	Grip	1.12299	0.000346539	0.00164952
FBgn0052647	CG32647	1.12206	0.0437343	0.10052
FBgn0286199	shps	1.12053	0.416508	0.566728
FBgn0051674	CG31674	1.119	1.23977e-17	3.21011e-16
FBgn0069969	CG40498	1.11797	0.38725	0.539068
FBgn0039704	neo	1.1157	0.365003	0.516513
FBgn0001145	Gs2	1.11283	3.866e-08	4.06731e-07
FBgn0040496	CG17104	1.11071	0.359487	0.510367
FBgn0051092	LpR2	1.10689	6.15534e-16	1.42562e-14
FBgn0038262	CG14857	1.10492	1.09577e-05	7.57009e-05
FBgn0024321	NK7.1	1.1047	9.28049e-22	3.00775e-20
FBgn0036311	CG17666	1.10389	0.00143043	0.00565877
FBgn0263289	scrib	1.10155	2.99362e-61	3.14265e-59
FBgn0052062	Rbfox1	1.10027	1.27988e-18	3.62495e-17
FBgn0003513	ss	1.09907	0.408396	0.559584
FBgn0262509	nrm	1.09682	0.0053347	0.0174566
FBgn0033728	Cpr49Ae	1.09419	0.394479	0.546847
FBgn0260758	CG42556	1.09394	0.0669022	0.14148
FBgn0025878	wrapper	1.09371	0.069332	0.145853
FBgn0037140	SLC22A	1.09358	0.435149	0.584353
FBgn0036165	chrb	1.09191	8.66835e-14	1.7016e-12
FBgn0051324	CG31324	1.08881	3.80698e-30	1.65621e-28
FBgn0033794	CG13326	1.08814	0.235973	0.378011
FBgn0051858	t-cup	1.07991	0.380563	0.532677
FBgn0043806	CG32032	1.07913	4.18498e-27	1.67712e-25
FBgn0039821	CG15556	1.07575	0.385007	0.537493
FBgn0030590	CG9518	1.07553	0.0952818	0.188418
FBgn0261059	Sfp78E	1.07499	0.0855142	0.172241
FBgn0024732	Drep1	1.07127	1.28168e-24	4.76094e-23
FBgn0261085	Syt12	1.07041	0.379997	0.532194
FBgn0040532	CG8369	1.07009	0.513868	0.655605
FBgn0039101	CG16710	1.06964	0.000320112	0.0015412
FBgn0016032	lbm	1.06664	8.19622e-21	2.56178e-19
FBgn0016930	Dyrk2	1.0621	6.22497e-30	2.67203e-28
FBgn0036007	path	1.06041	2.98989e-20	9.08061e-19
FBgn0039459	IntS12	1.06005	1.59744e-08	1.76119e-07
FBgn0032590	CG4631	1.06	0.0738884	0.153169
FBgn0027654	jdp	1.05994	0.185884	0.316069
FBgn0023090	dtr	1.05907	0.0207733	0.0546522
FBgn0036956	CG13813	1.05354	0.0436498	0.100374
FBgn0032144	CG17633	1.05241	0.0875343	0.175505
FBgn0010482	l(2)01289	1.05004	1.53611e-06	1.23734e-05
FBgn0040849	Ir41a	1.04922	0.177581	0.304883
FBgn0034822	RpL37b	1.04819	0.328849	0.480925
FBgn0051343	CG31343	1.04619	0.332638	0.484469
FBgn0263316	Mrp4	1.04156	1.06172e-23	3.74238e-22
FBgn0032707	CG10348	1.04048	0.38608	0.538243
FBgn0261560	Thor	1.04012	1.4476e-24	5.33625e-23
FBgn0035237	CG13917	1.03835	7.26738e-26	2.85319e-24
FBgn0040805	CG12355	1.03666	0.0582094	0.12659
FBgn0000017	Abl	1.03613	4.38898e-52	3.96157e-50
FBgn0261356	CG42633	1.03577	0.370644	0.521971
FBgn0011286	RyR	1.03442	0.0808731	0.164748
FBgn0262562	CG43102	1.03109	0.000916583	0.00383884
FBgn0264895	RapGAP1	1.0308	2.37023e-13	4.44498e-12
FBgn0036316	CG10960	1.03012	1.27089e-12	2.23168e-11
FBgn0001090	bnb	1.02963	0.364275	0.515785
FBgn0262480	CG43070	1.02433	0.347699	0.499119
FBgn0264542	hwt	1.02062	6.14895e-05	0.000359701
FBgn0039342	CG5107	1.01462	0.294751	0.443412
FBgn0030261	CG15203	1.01417	3.98454e-10	5.51328e-09
FBgn0003089	pip	1.0112	0.17467	0.301297
FBgn0262476	CG43066	1.01053	0.28222	0.429918
FBgn0035977	PGRP-LF	1.00878	5.71524e-15	1.21581e-13
FBgn0032219	CG4995	1.00157	0.106716	0.205312
FBgn0010043	GstD7	1.00034	0.338094	0.489405
FBgn0022382	Pka-R2	0.99953	2.17488e-20	6.66824e-19
FBgn0010105	comm	0.997928	0.00417282	0.0140913
FBgn0033448	hebe	0.996586	0.000214645	0.00107467
FBgn0052301	CG32301	0.996229	1.24831e-16	3.04449e-15
FBgn0000635	Fas2	0.994133	0.000473841	0.00216172
FBgn0250871	pot	0.991905	0.236877	0.378893
FBgn0035173	CG13907	0.991368	1.71761e-17	4.38853e-16
FBgn0050438	Ugt50B3	0.991119	2.16706e-15	4.80033e-14
FBgn0051816	CG31816	0.990822	0.236021	0.378026
FBgn0014396	tim	0.989345	0.271012	0.417055
FBgn0002567	Rab32	0.989307	4.02468e-08	4.22045e-07
FBgn0036765	CG7408	0.989232	1.85783e-13	3.51822e-12
FBgn0028540	CG9008	0.984527	2.33235e-05	0.000149079
FBgn0004511	dy	0.981381	0.220256	0.358995
FBgn0263776	CG43693	0.981178	0.221793	0.360741
FBgn0261611	CG42700	0.979502	0.284413	0.432372
FBgn0038850	CG17279	0.9767	0.234597	0.376494
FBgn0034142	CG8306	0.976272	1.14351e-40	6.98989e-39
FBgn0034321	CG14502	0.976084	7.2014e-07	6.13867e-06
FBgn0052305	CG32305	0.975884	7.28756e-07	6.20117e-06
FBgn0085479	CG34450	0.975194	0.230382	0.371147
FBgn0053819	His1:CG33819	0.974471	0.284466	0.432376
FBgn0002732	E(spl)malpha-BFM	0.970018	0.220274	0.358995
FBgn0263490	mld	0.96754	7.34022e-43	4.85561e-41
FBgn0010424	TpnC73F	0.965293	0.128306	0.237526
FBgn0035143	Ppm1	0.965197	0.0248223	0.0631376
FBgn0036043	Ae2	0.962947	7.0355e-15	1.49011e-13
FBgn0002543	robo2	0.96063	5.02359e-35	2.50092e-33
FBgn0264562	Hr4	0.957676	0.00976353	0.0291127
FBgn0035501	CG1299	0.956464	0.130569	0.240977
FBgn0054041	CG34041	0.956151	7.52955e-05	0.000428523
FBgn0051617	His1:CG31617	0.956041	0.086224	0.173358
FBgn0038460	CG18622	0.95414	0.0365654	0.0866623
FBgn0032681	CG10283	0.95093	0.136352	0.249363
FBgn0023407	B4	0.950612	5.84099e-51	5.08219e-49
FBgn0268063	ltl	0.949412	0.215562	0.352804
FBgn0039527	CG5639	0.949155	1.64088e-08	1.80497e-07
FBgn0264490	Eip93F	0.948482	3.70714e-09	4.54937e-08
FBgn0039783	PH4alphaNE2	0.947928	7.6335e-16	1.75953e-14
FBgn0039430	CG5455	0.947202	1.68986e-28	7.06521e-27
FBgn0261563	wb	0.946236	3.13191e-12	5.26969e-11
FBgn0031645	CG3036	0.945749	3.93237e-10	5.45673e-09
FBgn0286511	Pld	0.94196	9.19394e-18	2.43274e-16
FBgn0004839	otk	0.939244	0.0086579	0.0263032
FBgn0085421	Epac	0.938645	3.14897e-10	4.40127e-09
FBgn0004852	Ac76E	0.938383	2.5926e-27	1.04331e-25
FBgn0259878	Fs	0.936064	0.143132	0.25897
FBgn0263046	CG43341	0.93587	0.169547	0.294777
FBgn0034331	BomBc2	0.935515	2.498e-05	0.000158721
FBgn0285917	sbb	0.93462	1.05295e-35	5.32431e-34
FBgn0000448	Hr3	0.934068	0.0140103	0.0394955
FBgn0032147	IP3K1	0.933914	2.26465e-17	5.75579e-16
FBgn0250907	Cht10	0.932464	5.89495e-14	1.17388e-12
FBgn0050456	CG30456	0.932193	0.00213974	0.00794524
FBgn0053647	CG33647	0.928917	8.80037e-07	7.39721e-06
FBgn0052677	X11Lbeta	0.928124	0.024375	0.06218
FBgn0034629	Acox57D-d	0.926261	0.0092703	0.0278918
FBgn0033020	COX4L	0.924611	0.0321609	0.0781213
FBgn0040551	CG11686	0.924514	3.00932e-06	2.30484e-05
FBgn0038105	yellow-f2	0.921907	1.67249e-05	0.000110712
FBgn0004865	Eip78C	0.920337	1.9856e-05	0.000129486
FBgn0001255	ImpE3	0.919905	6.16539e-14	1.2227e-12
FBgn0036288	CG10660	0.918493	4.35283e-18	1.17429e-16
FBgn0030816	CG16700	0.91629	0.00390268	0.0133147
FBgn0030230	Rph	0.915613	0.00538345	0.0175831
FBgn0033438	Mmp2	0.91432	5.78643e-36	2.9569e-34
FBgn0038912	CG6656	0.914299	1.47554e-13	2.82194e-12
FBgn0284237	CG46321	0.913724	0.0163445	0.044867
FBgn0014018	Rel	0.913621	8.49272e-16	1.94367e-14
FBgn0264979	CG4267	0.911674	0.0182047	0.0490162
FBgn0050285	CG30285	0.910608	0.0197229	0.0525182
FBgn0259233	CG42331	0.909882	0.0117624	0.0340224
FBgn0030662	CG9220	0.908569	1.74513e-12	3.02051e-11
FBgn0030167	CG15252	0.903665	0.567864	0.702502
FBgn0033304	Cyp6a13	0.903657	0.0753496	0.155639
FBgn0029532	CG13361	0.903354	0.608229	0.735064
FBgn0259244	CG42342	0.901589	0.000831805	0.00352504
FBgn0035636	Cralbp	0.900004	0.0299775	0.0737073
FBgn0040491	Buffy	0.898604	0.539482	0.678531
FBgn0263346	smash	0.89782	1.49597e-22	5.01671e-21
FBgn0051720	mthl15	0.897177	0.30718	0.457009
FBgn0031513	CG3347	0.897077	0.339638	0.491051
FBgn0000061	al	0.895106	0.548035	0.685878
FBgn0038565	CG7794	0.894615	0.48791	0.631582
FBgn0000047	Act88F	0.894432	0.367607	0.518981
FBgn0034850	CG9875	0.891565	0.391569	0.543906
FBgn0002789	Mp20	0.891475	0.554821	0.692218
FBgn0085292	CG34263	0.890717	1.58366e-05	0.000105483
FBgn0034053	Cyp4aa1	0.890368	0.272609	0.418843
FBgn0035097	CG13405	0.890232	0.475277	0.621056
FBgn0011674	insc	0.889895	4.64826e-05	0.000278665
FBgn0052213	CG32213	0.889646	0.576383	0.709465
FBgn0039491	CG6059	0.88932	0.566834	0.701677
FBgn0050090	CG30090	0.888424	0.329062	0.481089
FBgn0051414	Gba1b	0.887897	0.577996	0.71035
FBgn0053257	CG33257	0.885573	0.386099	0.538243
FBgn0262102	CG42855	0.885428	3.71667e-08	3.93161e-07
FBgn0025642	CG32812	0.884863	1.91347e-06	1.51478e-05
FBgn0000250	cact	0.883917	3.41911e-36	1.76587e-34
FBgn0040609	CG3348	0.883224	0.00208563	0.00777424
FBgn0000535	eag	0.882671	1.50376e-05	0.000100577
FBgn0030348	CG10352	0.882432	0.127422	0.236479
FBgn0034049	bdg	0.880354	3.52032e-28	1.44678e-26
FBgn0034639	CG15673	0.879423	0.0310507	0.0759595
FBgn0053813	His1:CG33813	0.878837	0.0895425	0.178992
FBgn0086906	sls	0.878561	0.00188062	0.00715361
FBgn0263748	CG43673	0.878534	0.246988	0.389963
FBgn0004870	bab1	0.877564	0.0018895	0.00717891
FBgn0030319	CG2533	0.877205	0.162817	0.285751
FBgn0033860	S-Lap5	0.876788	0.481152	0.62613
FBgn0259229	CG42329	0.876179	0.496665	0.639486
FBgn0000422	Ddc	0.875855	0.285029	0.432832
FBgn0001137	grk	0.875276	1.54069e-15	3.43648e-14
FBgn0034439	CG10062	0.875207	0.0725493	0.151041
FBgn0034709	Swim	0.874375	6.09041e-05	0.000356492
FBgn0040397	CG3655	0.874093	8.25572e-10	1.09524e-08
FBgn0013949	Elal	0.874073	0.0352316	0.0841828
FBgn0005633	fln	0.873889	0.494747	0.637965
FBgn0031763	CG13996	0.872628	0.493451	0.637133
FBgn0267337	rn	0.871631	0.467083	0.614589
FBgn0263021	CG43316	0.871355	0.382879	0.535144
FBgn0039010	CG4907	0.871013	0.467924	0.614775
FBgn0261873	sdt	0.870234	7.97548e-13	1.42908e-11
FBgn0032428	CG6405	0.869837	0.0639816	0.13647
FBgn0013348	TpnC41C	0.867663	0.320339	0.471692
FBgn0034389	Mctp	0.86726	2.28412e-15	5.02507e-14
FBgn0033725	Cpr49Ac	0.867082	0.276442	0.422851
FBgn0259228	C3G	0.867067	3.31071e-30	1.44682e-28
FBgn0005677	dac	0.86703	0.561545	0.697502
FBgn0085425	CG34396	0.866892	0.4234	0.572877
FBgn0036410	CG8100	0.866505	0.561242	0.697257
FBgn0263041	CG43336	0.864947	0.566946	0.701725
FBgn0284227	CG46311	0.864703	3.19046e-14	6.45985e-13
FBgn0260969	CG42592	0.864462	0.571244	0.705328
FBgn0031693	Cyp4ac1	0.863859	0.26277	0.407422
FBgn0035496	CG14990	0.863734	0.333227	0.484612
FBgn0053126	NLaz	0.863477	0.0213267	0.0558042
FBgn0014019	Rh5	0.863465	0.609464	0.735619
FBgn0051029	CG31029	0.863371	0.448863	0.597865
FBgn0263038	CG43333	0.863139	0.305688	0.455748
FBgn0026616	alpha-Man-IIb	0.861662	2.41497e-08	2.60601e-07
FBgn0266347	nAChRalpha4	0.860197	7.28511e-08	7.39849e-07
FBgn0015380	drl	0.860003	0.317573	0.468405
FBgn0033203	CG2070	0.859921	0.30919	0.459197
FBgn0003435	sm	0.859289	3.94322e-16	9.2436e-15
FBgn0053494	CG33494	0.859077	6.6224e-17	1.63998e-15
FBgn0031850	Tsp	0.859001	1.54566e-20	4.78461e-19
FBgn0003391	shg	0.858901	4.59714e-15	9.88846e-14
FBgn0053988	Mid1	0.858836	0.199811	0.333871
FBgn0264090	CG43759	0.857093	0.019753	0.052584
FBgn0003048	pcx	0.857083	8.88388e-30	3.79648e-28
FBgn0037076	ebd2	0.856924	7.93805e-05	0.000448862
FBgn0031998	SLC5A11	0.855495	1.05977e-09	1.38314e-08
FBgn0053792	CG33792	0.853776	0.609413	0.735619
FBgn0037230	Nepl11	0.852961	0.339573	0.491031
FBgn0029587	CG14797	0.852019	0.514499	0.655977
FBgn0034804	CG3831	0.851845	1.76735e-20	5.45338e-19
FBgn0085483	CG34454	0.849466	0.0217368	0.0566843
FBgn0029003	mab-21	0.848735	0.633548	0.756062
FBgn0259683	Ir40a	0.84856	1.29814e-15	2.90219e-14
FBgn0261260	mgl	0.848135	7.67897e-17	1.89676e-15
FBgn0264489	CG43897	0.84716	0.135298	0.24767
FBgn0053795	CG33795	0.846886	0.539825	0.678769
FBgn0037717	CG8301	0.846646	1.82534e-17	4.6515e-16
FBgn0034626	CG10795	0.84532	1.05927e-16	2.6098e-15
FBgn0003520	stau	0.844585	9.15634e-16	2.08566e-14
FBgn0034628	Acox57D-p	0.842473	5.17278e-31	2.29168e-29
FBgn0053239	Ste:CG33239	0.84212	0.574718	0.708168
FBgn0039972	Marf1	0.840016	5.41089e-12	8.90262e-11
FBgn0085386	CG34357	0.839735	0.0030508	0.0108048
FBgn0030052	CG12065	0.838978	7.24821e-23	2.4649e-21
FBgn0052767	CG32767	0.83676	5.88892e-18	1.56251e-16
FBgn0000427	2020-12-01	0.833691	0.669551	0.783061
FBgn0264086	CG43755	0.83369	0.685817	0.79563
FBgn0040733	BomS6	0.833238	0.0352727	0.08426
FBgn0034072	Dg	0.833062	2.25714e-16	5.34299e-15
FBgn0038744	CG4733	0.832483	0.000349798	0.00166176
FBgn0284435	tyn	0.831963	8.47089e-08	8.50435e-07
FBgn0028490	CG31705	0.829131	9.59207e-26	3.73549e-24
FBgn0265598	Bx	0.828696	5.61871e-15	1.19791e-13
FBgn0264707	RhoGEF3	0.827274	3.81436e-23	1.32993e-21
FBgn0052311	zormin	0.826581	0.000781941	0.00332687
FBgn0020304	drongo	0.824977	1.70005e-49	1.41544e-47
FBgn0039109	CG10365	0.822487	1.91175e-20	5.88017e-19
FBgn0033130	Tsp42Ei	0.819832	0.504659	0.646538
FBgn0001168	h	0.818267	3.68855e-28	1.50949e-26
FBgn0000036	nAChRalpha1	0.818045	0.570203	0.704583
FBgn0003891	tud	0.81722	1.87751e-09	2.37654e-08
FBgn0085426	Rgk3	0.816566	0.173119	0.299209
FBgn0262867	Ptr	0.816058	0.221672	0.360605
FBgn0043069	MESK4	0.81519	1.17116e-08	1.32293e-07
FBgn0263873	sick	0.814392	1.20187e-11	1.90916e-10
FBgn0039647	jus	0.81399	0.195363	0.328151
FBgn0020386	Pdk1	0.81333	8.93841e-25	3.33309e-23
FBgn0035131	mthl9	0.812796	0.0174874	0.0473754
FBgn0040371	CG12470	0.81065	0.433991	0.583203
FBgn0011672	Mvl	0.809395	2.52333e-18	6.90378e-17
FBgn0033798	CG15870	0.809326	0.113896	0.21641
FBgn0028979	tio	0.807296	0.00251212	0.00912106
FBgn0030817	CG4991	0.803273	0.219535	0.358117
FBgn0032218	CG5381	0.803152	2.54047e-07	2.35695e-06
FBgn0039264	CG11786	0.801913	0.274797	0.421343
FBgn0263029	CG43324	0.801118	0.0742453	0.15381
FBgn0015372	RabX1	0.800265	1.95878e-27	7.91544e-26
FBgn0063491	GstE9	0.800027	1.05001e-15	2.38052e-14
FBgn0259145	CG42260	0.799874	0.249281	0.392749
FBgn0035312	CG15820	0.798702	1.894e-11	2.93145e-10
FBgn0039925	Kif3C	0.795395	0.361123	0.512148
FBgn0265487	mbl	0.794479	3.09388e-10	4.33682e-09
FBgn0264339	CG43795	0.793898	0.338176	0.489451
FBgn0041160	comm2	0.792306	1.65725e-08	1.82091e-07
FBgn0035983	CG4080	0.790137	1.38409e-18	3.88591e-17
FBgn0035776	CG8564	0.788801	4.35018e-06	3.24684e-05
FBgn0046763	CG17278	0.78484	2.70699e-23	9.47251e-22
FBgn0037513	pyd3	0.784262	4.02587e-11	6.11349e-10
FBgn0051778	CG31778	0.784066	0.130222	0.240568
FBgn0032587	CG5953	0.782621	2.26206e-21	7.13955e-20
FBgn0011582	Dop1R1	0.78141	0.320955	0.472312
FBgn0036670	CG13029	0.779466	0.167739	0.292168
FBgn0039914	mav	0.778468	1.19884e-11	1.90748e-10
FBgn0004198	ct	0.775772	1.36564e-16	3.31391e-15
FBgn0022774	Oat	0.773044	3.7679e-06	2.85191e-05
FBgn0261858	Mzt1	0.77261	0.226621	0.36625
FBgn0243516	Vrp1	0.771973	3.77715e-19	1.08895e-17
FBgn0286852	naz	0.771774	0.464364	0.612096
FBgn0000479	dnc	0.771358	3.70336e-18	1.00469e-16
FBgn0031055	et	0.770657	0.0528338	0.117276
FBgn0030596	CG12398	0.770395	0.672489	0.785262
FBgn0038211	CG9649	0.770276	0.636955	0.758652
FBgn0035480	CG14984	0.770158	0.172562	0.298552
FBgn0003159	CG2841	0.770144	4.69889e-07	4.19426e-06
FBgn0031801	CG9498	0.769969	0.663455	0.779046
FBgn0058160	CG40160	0.769687	0.0796457	0.16266
FBgn0023095	caps	0.769291	6.69059e-07	5.73869e-06
FBgn0032895	twit	0.769054	0.680361	0.791202
FBgn0052351	S-Lap2	0.768862	0.67083	0.783988
FBgn0001112	Gld	0.768767	0.666264	0.780805
FBgn0026320	Tom	0.768718	0.663938	0.779518
FBgn0032178	Spn31A	0.767962	0.0176435	0.0477307
FBgn0260960	Baldspot	0.767356	1.17306e-22	3.94753e-21
FBgn0033875	CG6357	0.7666	2.82281e-12	4.7662e-11
FBgn0259110	mmd	0.76518	0.657683	0.774245
FBgn0004795	retn	0.764944	0.69209	0.80012
FBgn0034219	mthl4	0.764325	1.32275e-14	2.74733e-13
FBgn0250785	vari	0.763919	9.09729e-20	2.71178e-18
FBgn0029681	CG15239	0.763629	0.682683	0.793043
FBgn0029843	Nep1	0.76359	0.15765	0.278402
FBgn0038484	CG5246	0.762226	0.680212	0.791149
FBgn0053855	His1:CG33855	0.76198	0.276199	0.422546
FBgn0037888	scpr-B	0.761795	0.685501	0.79555
FBgn0085337	CG34308	0.757513	0.42777	0.577577
FBgn0040355	CG3526	0.754503	0.259986	0.404729
FBgn0025574	Pli	0.75311	3.6007e-17	9.03261e-16
FBgn0034391	CG15080	0.750586	0.000488246	0.00221592
FBgn0030757	CG9902	0.750238	3.19259e-09	3.93794e-08
FBgn0260442	rhea	0.749959	1.91049e-18	5.27186e-17
FBgn0262823	hemo	0.749784	5.7756e-06	4.20352e-05
FBgn0262846	CG43210	0.749784	5.7756e-06	4.20352e-05
FBgn0038814	CG15923	0.74976	0.260327	0.405065
FBgn0003997	hid	0.748829	5.46013e-05	0.000323918
FBgn0003380	Sh	0.74747	0.399852	0.551839
FBgn0031117	GstT3	0.746389	2.20802e-07	2.06238e-06
FBgn0034021	CG8180	0.744905	0.00048996	0.00222161
FBgn0024236	foi	0.744628	5.74016e-18	1.53142e-16
FBgn0015577	alpha-Est9	0.74375	8.20007e-16	1.88563e-14
FBgn0037296	Prosbeta2R2	0.743228	0.477925	0.623403
FBgn0026160	tna	0.742221	2.14629e-19	6.28147e-18
FBgn0267253	CG32700	0.741833	5.21418e-09	6.25573e-08
FBgn0085423	GramD1B	0.741266	1.05913e-21	3.39837e-20
FBgn0286070	cnk	0.740535	2.69232e-15	5.90965e-14
FBgn0041709	yellow-g	0.740257	0.365729	0.517086
FBgn0004055	uzip	0.739245	4.61373e-17	1.15141e-15
FBgn0019929	Ser7	0.738288	0.190566	0.321652
FBgn0260995	dpr21	0.737642	0.00535051	0.0174987
FBgn0027865	Tsp96F	0.736881	1.28334e-08	1.42959e-07
FBgn0053468	CG33468	0.73354	1.36119e-06	1.10474e-05
FBgn0053843	His1:CG33843	0.733341	0.458649	0.606467
FBgn0005636	nvy	0.732991	0.00512332	0.0168475
FBgn0004369	Ptp99A	0.731929	1.43382e-09	1.83659e-08
FBgn0010041	GstD5	0.731926	0.000108989	0.000589699
FBgn0086917	spok	0.72963	0.50966	0.65127
FBgn0052103	SCaMC	0.728891	2.02581e-11	3.12046e-10
FBgn0003396	shn	0.728273	4.68847e-14	9.43358e-13
FBgn0034251	ND-51L1	0.72662	0.454433	0.602404
FBgn0037166	CG11426	0.726205	5.47556e-06	4.00932e-05
FBgn0053510	CG33510	0.726104	0.370859	0.522197
FBgn0261954	east	0.725086	6.291e-19	1.79759e-17
FBgn0259745	wech	0.724479	6.28291e-08	6.43482e-07
FBgn0030716	CG9170	0.723436	4.7155e-15	1.01205e-13
FBgn0267336	Glut4EF	0.721894	3.05464e-12	5.14864e-11
FBgn0020306	dom	0.721242	4.38811e-18	1.18051e-16
FBgn0261262	CG42613	0.72055	1.55959e-17	4.00599e-16
FBgn0262730	dtn	0.720392	8.82865e-10	1.16485e-08
FBgn0036732	Oatp74D	0.71952	2.4747e-13	4.62294e-12
FBgn0040765	luna	0.71892	4.09859e-08	4.2933e-07
FBgn0000489	Pka-C3	0.717079	0.262724	0.407416
FBgn0263780	CG17684	0.71699	0.470439	0.617156
FBgn0002716	mei-W68	0.715735	3.90893e-06	2.94941e-05
FBgn0036752	Adgf-A	0.714622	1.08045e-13	2.10383e-12
FBgn0051119	HDAC11	0.713106	0.00925228	0.0278462
FBgn0016059	Sema1b	0.710553	4.17124e-11	6.32431e-10
FBgn0264753	Rgk1	0.71047	0.367729	0.519077
FBgn0000094	Anp	0.709962	0.0279681	0.0697073
FBgn0030674	HUWE1	0.709007	8.47964e-15	1.79204e-13
FBgn0001224	Hsp23	0.708886	1.60247e-10	2.30308e-09
FBgn0265045	Strn-Mlck	0.708646	2.16046e-10	3.08664e-09
FBgn0266101	CG44838	0.707663	5.10451e-10	6.97304e-09
FBgn0032706	Irk3	0.707375	0.170018	0.295408
FBgn0266721	gammaSnap2	0.707344	0.568483	0.703178
FBgn0033963	CG12857	0.707329	0.57793	0.71035
FBgn0028956	mthl3	0.706988	5.79948e-10	7.83376e-09
FBgn0042627	FASN2	0.706586	0.351253	0.502632
FBgn0000044	Act57B	0.70647	0.175005	0.30166
FBgn0000808	gd	0.705794	0.584609	0.715608
FBgn0052594	be	0.704308	1.06496e-11	1.70287e-10
FBgn0023172	RhoGEF2	0.703839	1.29483e-15	2.90151e-14
FBgn0027343	fz3	0.702247	0.0101955	0.0301771
FBgn0053111	CG33111	0.700451	3.28254e-12	5.49441e-11
FBgn0013342	nSyb	0.699859	0.206952	0.34239
FBgn0020269	mspo	0.699045	0.00125512	0.00507621
FBgn0033132	Tsp42Ej	0.697172	0.135124	0.247446
FBgn0037556	CG9636	0.69399	1.80232e-13	3.4198e-12
FBgn0063495	GstE5	0.692646	0.271389	0.417502
FBgn0039594	snu	0.691731	0.540545	0.679224
FBgn0038452	CG14905	0.691669	0.55695	0.693442
FBgn0040850	CG15210	0.691174	0.55642	0.693228
FBgn0028703	Nhe3	0.690967	1.24553e-15	2.80405e-14
FBgn0039590	CG10011	0.689838	6.37273e-10	8.58407e-09
FBgn0264750	CG44008	0.688382	0.208536	0.344003
FBgn0036985	zye	0.687571	0.0101011	0.0299621
FBgn0032533	CG16888	0.687262	0.0093948	0.0281961
FBgn0029837	Tsp5D	0.687194	0.544524	0.682587
FBgn0051901	Mur29B	0.687106	0.527597	0.667828
FBgn0035777	CG8563	0.684119	0.00129031	0.00518592
FBgn0052820	CG32820	0.683654	0.532293	0.672011
FBgn0052264	CG32264	0.683259	1.39851e-16	3.38516e-15
FBgn0032670	CG5783	0.683222	0.000885759	0.00372752
FBgn0036993	CG5910	0.683196	0.298763	0.448202
FBgn0036101	NijA	0.683184	1.56727e-11	2.44534e-10
FBgn0053803	His3:CG33803	0.683123	0.349166	0.50063
FBgn0265272	CG30060	0.682545	0.51629	0.657133
FBgn0031170	ABCA	0.68228	3.86844e-09	4.73528e-08
FBgn0053513	Nmdar2	0.681912	0.593274	0.723373
FBgn0039026	CG7029	0.68115	5.75589e-18	1.53142e-16
FBgn0030455	CG4318	0.680848	0.563417	0.6987
FBgn0035124	ttm2	0.679799	0.333283	0.48462
FBgn0038100	Paip2	0.678685	3.79027e-08	3.99198e-07
FBgn0030894	Mvb12	0.675842	1.90739e-18	5.27186e-17
FBgn0013733	shot	0.675536	7.043e-09	8.28518e-08
FBgn0000490	dpp	0.67358	0.243914	0.386563
FBgn0266409	CG45049	0.672888	2.48639e-10	3.52104e-09
FBgn0264449	CG43867	0.672056	1.4465e-14	2.9851e-13
FBgn0014163	fax	0.669654	6.16955e-09	7.32009e-08
FBgn0053810	His1:CG33810	0.669315	0.237146	0.379113
FBgn0261975	CG42806	0.667087	2.73197e-28	1.12758e-26
FBgn0051769	CG31769	0.665873	0.395559	0.547694
FBgn0040256	Ugt35C1	0.665029	0.0522022	0.116195
FBgn0039883	RhoGAP100F	0.662522	0.00525391	0.0172183
FBgn0260866	dnr1	0.662315	5.32154e-07	4.69365e-06
FBgn0259212	cno	0.65964	1.18863e-14	2.4848e-13
FBgn0032752	CG10702	0.659042	0.475001	0.620863
FBgn0034880	ItgaPS5	0.657295	0.122496	0.22939
FBgn0035089	Phk-3	0.6569	0.303879	0.454032
FBgn0026189	prominin-like	0.656434	1.12241e-09	1.45702e-08
FBgn0263983	CG43732	0.655961	5.77512e-20	1.73757e-18
FBgn0038475	Keap1	0.655145	3.00561e-11	4.58582e-10
FBgn0053809	His3:CG33809	0.654824	0.412191	0.563142
FBgn0031201	CG12446	0.654492	0.307197	0.457009
FBgn0039184	CG6432	0.654436	0.572208	0.706075
FBgn0026206	mei-P26	0.654183	7.42198e-07	6.2989e-06
FBgn0030964	Pvf1	0.653947	0.452525	0.601048
FBgn0037146	CG7470	0.653025	0.583239	0.714294
FBgn0014906	Hydr2	0.653001	3.07324e-31	1.38053e-29
FBgn0259221	ATP8A	0.65274	2.21364e-11	3.40435e-10
FBgn0086674	Tpst	0.651503	1.11534e-12	1.98013e-11
FBgn0027948	msps	0.651346	2.71487e-08	2.91013e-07
FBgn0010434	cora	0.651147	2.02117e-18	5.56138e-17
FBgn0030195	CG2898	0.650422	0.0713316	0.148988
FBgn0034887	St1	0.650402	0.0248373	0.0631429
FBgn0040038	klhl10	0.649924	0.394818	0.547159
FBgn0004606	zfh1	0.64986	2.51777e-12	4.28864e-11
FBgn0038815	CG5466	0.644909	5.86325e-12	9.61414e-11
FBgn0034477	CG13872	0.644141	0.673214	0.78535
FBgn0264308	CG43778	0.642647	0.453626	0.601637
FBgn0040918	schlank	0.64145	3.59812e-15	7.82672e-14
FBgn0004648	svr	0.640469	1.16011e-08	1.31353e-07
FBgn0035286	CG13924	0.639167	0.200298	0.334396
FBgn0052447	CG32447	0.638608	4.11546e-09	5.00594e-08
FBgn0041156	exex	0.636759	0.648262	0.766517
FBgn0042185	MCU	0.636043	6.08491e-12	9.96069e-11
FBgn0003310	S	0.635856	2.79769e-14	5.70044e-13
FBgn0022709	Adk1	0.635505	0.000517312	0.00232995
FBgn0000414	Dab	0.634812	1.14333e-15	2.58602e-14
FBgn0034447	CG7744	0.63409	8.33516e-10	1.10427e-08
FBgn0261811	pico	0.633669	8.42289e-11	1.2363e-09
FBgn0261793	Trf2	0.633649	1.87162e-07	1.77043e-06
FBgn0014343	mirr	0.633298	0.347971	0.499364
FBgn0286831	sov	0.632738	1.25496e-11	1.98045e-10
FBgn0053808	His2A:CG33808	0.632628	0.638436	0.759657
FBgn0001225	Hsp26	0.632036	9.06151e-08	9.05964e-07
FBgn0034590	Magi	0.630006	1.06517e-17	2.7955e-16
FBgn0039058	VhaAC39-2	0.629471	5.31873e-06	3.91229e-05
FBgn0005614	trpl	0.629255	0.210621	0.346479
FBgn0262579	Ect4	0.629155	1.15225e-12	2.03818e-11
FBgn0050389	CG30389	0.627899	1.65441e-24	6.05238e-23
FBgn0035936	Tsp66E	0.625321	7.76789e-05	0.000440013
FBgn0039492	CG6051	0.624596	1.14394e-17	2.97795e-16
FBgn0265416	Neto	0.624249	0.504119	0.64607
FBgn0030574	sbm	0.62351	6.25863e-07	5.42115e-06
FBgn0020493	Dad	0.620416	8.09726e-06	5.69995e-05
FBgn0053136	CG33136	0.620111	0.0233977	0.0602599
FBgn0033873	CG6337	0.619919	0.000724545	0.0031064
FBgn0039897	CG1674	0.619325	7.59899e-09	8.88333e-08
FBgn0031313	CG5080	0.618718	0.000172717	0.000886078
FBgn0029114	Tollo	0.618653	2.16215e-07	2.02346e-06
FBgn0034808	CG9896	0.618594	0.677336	0.788634
FBgn0265174	PIG-V	0.618113	1.66902e-15	3.71416e-14
FBgn0037623	CG9801	0.61766	0.163293	0.286067
FBgn0051140	CG31140	0.616691	0.000235225	0.00116622
FBgn0038874	ETHR	0.615939	0.673867	0.785825
FBgn0050354	UQCR-11L	0.615822	0.668302	0.782291
FBgn0010246	Myo61F	0.615409	4.09077e-19	1.17236e-17
FBgn0264324	spg	0.614993	6.68393e-11	9.91603e-10
FBgn0038725	CG6184	0.614623	0.321666	0.472926
FBgn0038821	CG17267	0.614008	0.661088	0.777129
FBgn0010247	Parp	0.613855	3.72638e-05	0.000227925
FBgn0031737	obst-E	0.613816	0.620276	0.74538
FBgn0001226	Hsp27	0.613738	6.06344e-06	4.38986e-05
FBgn0010399	Nmdar1	0.613665	0.518709	0.659445
FBgn0051551	CG31551	0.613515	0.648182	0.766517
FBgn0003701	thr	0.612582	1.23418e-06	1.00588e-05
FBgn0034974	CG16786	0.611406	0.658534	0.775152
FBgn0052057	dpr10	0.611405	0.658742	0.775302
FBgn0033365	CG8170	0.610768	0.636031	0.757808
FBgn0053846	His1:CG33846	0.610692	0.467814	0.614775
FBgn0035142	Hipk	0.609809	1.59793e-11	2.48516e-10
FBgn0053124	CG33124	0.609784	0.523906	0.664724
FBgn0283499	InR	0.609596	4.50017e-06	3.34843e-05
FBgn0034013	unc-5	0.609449	3.95438e-09	4.83436e-08
FBgn0031473	CG3104	0.609304	0.627341	0.751354
FBgn0036053	iPLA2-VIA	0.607776	4.55217e-18	1.22125e-16
FBgn0036459	CG3349	0.604888	0.649967	0.767931
FBgn0029859	CG15892	0.604879	0.237794	0.379794
FBgn0050289	CG30289	0.602908	0.666328	0.780805
FBgn0083978	CG17672	0.602838	0.644888	0.764024
FBgn0031168	CG1722	0.602592	0.651427	0.769006
FBgn0037726	CG9492	0.602232	0.281288	0.428701
FBgn0250862	CG42237	0.602175	0.656338	0.77285
FBgn0016070	smg	0.602028	2.3766e-09	2.96171e-08
FBgn0063492	GstE8	0.601985	2.54444e-10	3.58747e-09
FBgn0039466	CG5521	0.601544	4.30772e-09	5.22663e-08
FBgn0265623	Su(z)2	0.599615	1.71321e-08	1.88024e-07
FBgn0041621	Or82a	0.599583	0.502434	0.644423
FBgn0051176	CG31176	0.599477	0.702215	0.807188
FBgn0266569	CG42259	0.598699	2.17344e-08	2.35326e-07
FBgn0030343	ATP7	0.598621	3.46954e-15	7.56407e-14
FBgn0263352	Unr	0.598022	1.38126e-05	9.33535e-05
FBgn0037004	CG17637	0.59735	0.283668	0.431449
FBgn0038853	RhoGAP93B	0.596154	1.15368e-16	2.82083e-15
FBgn0053834	His1:CG33834	0.595488	0.407762	0.559081
FBgn0051274	CG31274	0.595345	2.08814e-05	0.000135533
FBgn0030270	CG15199	0.594062	0.54484	0.682587
FBgn0021872	Xbp1	0.593325	9.47788e-13	1.68888e-11
FBgn0036279	Ncc69	0.593142	1.32956e-06	1.08089e-05
FBgn0043884	mask	0.593141	4.61445e-13	8.4406e-12
FBgn0037810	sle	0.592976	1.04466e-07	1.03587e-06
FBgn0029006	Smurf	0.592877	9.65164e-11	1.40809e-09
FBgn0086347	Myo31DF	0.591253	1.63903e-23	5.75628e-22
FBgn0038665	euc	0.590525	0.307275	0.45704
FBgn0050015	CG30015	0.590382	4.87972e-23	1.68919e-21
FBgn0037003	CG18281	0.589697	0.126927	0.235788
FBgn0033222	CG12824	0.58891	0.389141	0.541078
FBgn0022987	qkr54B	0.588494	3.00186e-19	8.7063e-18
FBgn0265297	pAbp	0.587353	1.43371e-12	2.50847e-11
FBgn0035144	Kah	0.587125	0.0313751	0.0765783
FBgn0085451	htk	0.58618	1.26713e-08	1.41479e-07
FBgn0015036	Cyp4ae1	0.585983	0.0587767	0.127623
FBgn0015558	tty	0.585205	0.146769	0.26436
FBgn0261671	tweek	0.585179	6.70267e-07	5.74396e-06
FBgn0003731	Egfr	0.584729	0.445432	0.594853
FBgn0031322	CG5001	0.584584	0.00625644	0.0200347
FBgn0029531	CG13362	0.584562	0.484549	0.628268
FBgn0026718	Agpat2	0.583986	0.00113393	0.0046287
FBgn0030983	CG15882	0.583787	0.568974	0.703694
FBgn0260634	eIF4G2	0.583394	1.03894e-09	1.35963e-08
FBgn0031968	CG7231	0.582056	5.87252e-06	4.26763e-05
FBgn0029672	CG2875	0.582006	1.61394e-06	1.29787e-05
FBgn0037060	CG10508	0.581507	0.156402	0.276908
FBgn0058006	CG40006	0.580772	8.50104e-05	0.000476512
FBgn0031150	bves	0.580188	8.37997e-09	9.70429e-08
FBgn0033159	Dscam1	0.580154	9.11463e-11	1.3358e-09
FBgn0037133	CG7370	0.57953	0.441232	0.590469
FBgn0004456	mew	0.579371	7.46444e-08	7.54885e-07
FBgn0030613	Rab3-GEF	0.577899	0.163155	0.285876
FBgn0038219	CG14839	0.576999	0.386755	0.538691
FBgn0051522	CG31522	0.576822	3.11255e-10	4.35667e-09
FBgn0032074	Tsp29Fa	0.576558	0.481082	0.62613
FBgn0039431	plum	0.575439	3.52397e-06	2.67567e-05
FBgn0039419	CG12290	0.575382	2.46658e-12	4.21633e-11
FBgn0053832	His2A:CG33832	0.575199	0.400146	0.552166
FBgn0043903	dome	0.574692	8.36683e-09	9.7007e-08
FBgn0263391	hts	0.574507	1.19555e-11	1.90538e-10
FBgn0032228	CG5367	0.574156	1.01794e-05	7.07288e-05
FBgn0264006	dysc	0.573186	0.57286	0.7066
FBgn0262893	CG43248	0.573178	0.583218	0.714294
FBgn0039321	CG10550	0.57286	0.00052148	0.00234581
FBgn0030701	CG16952	0.572318	2.88307e-13	5.36507e-12
FBgn0264087	Slob	0.570533	0.575937	0.709219
FBgn0000064	Ald1	0.569658	2.23244e-10	3.18007e-09
FBgn0039071	bb8	0.569017	0.449763	0.598535
FBgn0034372	Gint3	0.568857	1.72015e-18	4.77391e-17
FBgn0259202	CG42306	0.568857	1.72015e-18	4.77391e-17
FBgn0261570	raskol	0.567658	2.66004e-12	4.49924e-11
FBgn0266346	CngB	0.567621	0.159264	0.280689
FBgn0035476	CG12766	0.565473	0.48578	0.629247
FBgn0029896	CG3168	0.565243	5.79269e-06	4.21278e-05
FBgn0028494	CG6424	0.56418	8.37656e-16	1.92163e-14
FBgn0033497	CG12912	0.563428	0.259045	0.403721
FBgn0034262	swi2	0.563338	0.612378	0.73837
FBgn0054056	CG34056	0.563183	0.0906302	0.180624
FBgn0266696	Svil	0.562945	1.69122e-16	4.05304e-15
FBgn0023215	Mnt	0.562504	1.11266e-05	7.66479e-05
FBgn0284231	CG46315	0.562089	1.22544e-15	2.76526e-14
FBgn0003277	RpII215	0.561832	2.83472e-09	3.51447e-08
FBgn0051473	CG31473	0.561588	0.49534	0.638397
FBgn0029762	NAAT1	0.560149	0.515179	0.656368
FBgn0284223	CG46307	0.559782	5.87985e-06	4.26974e-05
FBgn0263197	Patronin	0.55838	1.29002e-18	3.64298e-17
FBgn0031948	CG7149	0.558134	0.000211704	0.00106325
FBgn0030837	CG8661	0.558121	0.580153	0.712075
FBgn0010223	Galphaf	0.557792	0.114852	0.217588
FBgn0040212	Dhap-at	0.556958	1.3082e-13	2.51685e-12
FBgn0029930	CG12541	0.556928	0.61812	0.743715
FBgn0040206	krz	0.556137	8.18042e-10	1.08675e-08
FBgn0040153	l(1)G0469	0.556037	0.0115039	0.0333849
FBgn0020261	pcm	0.555994	2.14216e-09	2.68688e-08
FBgn0039738	Mgat2	0.555936	6.36164e-11	9.51095e-10
FBgn0027836	Dgp-1	0.554748	1.55814e-09	1.98791e-08
FBgn0003888	betaTub60D	0.554633	2.93601e-25	1.12079e-23
FBgn0028360	Cdc7	0.553765	1.57096e-10	2.26116e-09
FBgn0016081	fry	0.552804	6.04595e-16	1.40365e-14
FBgn0086779	step	0.552164	6.69658e-06	4.81217e-05
FBgn0052532	CG32532	0.55193	0.507737	0.649467
FBgn0266377	Pde8	0.551709	5.35778e-11	8.035e-10
FBgn0265767	zyd	0.550013	0.579157	0.711251
FBgn0050091	CG30091	0.549855	5.41096e-07	4.75515e-06
FBgn0265140	Meltrin	0.549829	5.33435e-13	9.73896e-12
FBgn0034570	CG10543	0.549701	7.57072e-16	1.74924e-14
FBgn0012051	CalpA	0.549562	9.92389e-06	6.90525e-05
FBgn0030695	PGRP-LE	0.549373	0.0143302	0.0401587
FBgn0036895	ms(3)76Cc	0.548916	0.560116	0.696216
FBgn0034271	Vps50	0.548872	1.62565e-06	1.3062e-05
FBgn0021764	sdk	0.547665	8.91131e-05	0.000497488
FBgn0010488	NAT1	0.546928	2.34512e-14	4.80874e-13
FBgn0061362	CG33785	0.546366	0.000469735	0.00214704
FBgn0061361	CG33786	0.546366	0.000469735	0.00214704
FBgn0263706	CG43658	0.546221	0.0257361	0.0649489
FBgn0259789	zld	0.54567	0.601467	0.729312
FBgn0047095	CG33939	0.545668	0.59035	0.720445
FBgn0035267	CG13921	0.545664	0.261972	0.406838
FBgn0011829	Ret	0.545142	0.00204766	0.00765635
FBgn0001257	ImpL2	0.544965	5.42462e-10	7.38879e-09
FBgn0261934	dikar	0.544883	7.47519e-09	8.76157e-08
FBgn0283741	prage	0.544328	1.9141e-08	2.09122e-07
FBgn0262009	CG42827	0.544156	0.550306	0.688123
FBgn0050115	GEFmeso	0.543949	1.55674e-12	2.71391e-11
FBgn0024804	Dbp80	0.543897	1.35217e-05	9.15156e-05
FBgn0035285	CG12025	0.543401	3.03588e-14	6.15978e-13
FBgn0030266	CG11122	0.543212	0.000142116	0.000748805
FBgn0286516	aqz	0.543101	2.17997e-06	1.71033e-05
FBgn0031397	CG15385	0.542686	0.0724082	0.15078
FBgn0015040	Cyp9c1	0.542684	0.145091	0.261973
FBgn0260934	par-1	0.542684	7.94278e-09	9.23121e-08
FBgn0028369	kirre	0.541855	0.483183	0.627398
FBgn0002932	neur	0.541666	1.26395e-11	1.9914e-10
FBgn0266557	kis	0.5412	1.26653e-05	8.61418e-05
FBgn0026577	CG8677	0.540919	1.17445e-08	1.3251e-07
FBgn0004110	tin	0.540762	0.498678	0.641054
FBgn0050281	CG30281	0.539834	0.722747	0.822759
FBgn0015519	nAChRalpha3	0.539174	0.529513	0.669874
FBgn0063496	GstE4	0.539053	0.729834	0.826637
FBgn0030512	Nadsyn	0.538493	1.69555e-07	1.61655e-06
FBgn0015737	Hmu	0.538359	1.60385e-18	4.47687e-17
FBgn0052813	CG32813	0.538269	0.000298863	0.00145265
FBgn0002121	l(2)gl	0.538052	6.25692e-05	0.000364691
FBgn0040259	Ugt302C1	0.537818	1.43519e-05	9.64583e-05
FBgn0035432	ZnT63C	0.537668	3.34292e-24	1.2047e-22
FBgn0041225	Gr94a	0.537667	0.105389	0.203284
FBgn0037807	CG6293	0.536999	4.55818e-10	6.26214e-09
FBgn0034240	MESR4	0.536952	6.92474e-06	4.94926e-05
FBgn0262617	Nuak1	0.536764	5.18596e-08	5.36828e-07
FBgn0044826	Pak3	0.536217	2.12526e-09	2.66915e-08
FBgn0010040	GstD4	0.535689	0.430074	0.579633
FBgn0085430	CG34401	0.535495	7.92961e-13	1.4235e-11
FBgn0261547	Exn	0.535458	9.26521e-15	1.94529e-13
FBgn0038365	CG9593	0.535232	0.418272	0.568328
FBgn0034199	Gbp1	0.535219	1.92453e-06	1.52229e-05
FBgn0002921	Atpalpha	0.534723	1.36021e-14	2.81304e-13
FBgn0250789	alpha-Spec	0.533358	1.09722e-09	1.42624e-08
FBgn0031571	bark	0.531672	0.294533	0.443243
FBgn0039564	Nep7	0.530475	0.0501254	0.112271
FBgn0027339	jim	0.526864	4.21937e-08	4.41502e-07
FBgn0015903	apt	0.526412	3.48875e-07	3.15786e-06
FBgn0034087	clu	0.526073	6.82657e-09	8.0699e-08
FBgn0013685	mt:ND6	0.525784	0.216811	0.354428
FBgn0261477	slim	0.525712	1.07588e-13	2.09916e-12
FBgn0263593	Lpin	0.524095	4.41712e-11	6.67614e-10
FBgn0015838	Vang	0.523571	1.47519e-10	2.13284e-09
FBgn0037186	CG11241	0.523549	0.289655	0.438066
FBgn0032402	PLCXD	0.523518	0.00276885	0.00993302
FBgn0005624	Psc	0.523231	3.70071e-10	5.14265e-09
FBgn0038221	IFT54	0.522671	0.517547	0.658387
FBgn0036486	Msh6	0.522496	2.83481e-07	2.60253e-06
FBgn0040395	Unc-76	0.522231	3.43896e-19	9.94415e-18
FBgn0010877	l(3)05822	0.519174	5.56188e-13	1.01161e-11
FBgn0086686	l(3)L1231	0.517293	9.46557e-07	7.8877e-06
FBgn0017581	Lk6	0.516797	5.79826e-10	7.83376e-09
FBgn0004390	RasGAP1	0.515833	2.19083e-12	3.76496e-11
FBgn0051849	CG31849	0.515651	5.60854e-05	0.000331096
FBgn0260945	Atg1	0.515601	1.05211e-09	1.375e-08
FBgn0259992	CG42489	0.515509	0.573462	0.707001
FBgn0032957	CG2225	0.515095	1.52784e-05	0.000102117
FBgn0036449	bmm	0.514353	1.90436e-07	1.79788e-06
FBgn0033631	Sod3	0.513444	0.485701	0.629228
FBgn0261554	CG42672	0.51264	9.75171e-10	1.27965e-08
FBgn0014141	cher	0.512473	6.55336e-12	1.06374e-10
FBgn0003963	ush	0.512341	8.86139e-07	7.44203e-06
FBgn0010051	Itpr	0.512242	4.29097e-07	3.84793e-06
FBgn0052529	Hers	0.511728	1.59731e-12	2.77961e-11
FBgn0052676	stx	0.511665	9.9032e-12	1.59143e-10
FBgn0053300	Muc30E	0.510935	0.0790154	0.161749
FBgn0035445	Ids	0.510632	4.05111e-10	5.58937e-09
FBgn0033558	CG12344	0.509323	8.93797e-07	7.48033e-06
FBgn0030766	mthl1	0.508701	2.3217e-06	1.81415e-05
FBgn0037614	TMEM216	0.508334	6.55352e-06	4.7199e-05
FBgn0034540	Lrt	0.508054	0.562766	0.698252
FBgn0039831	CG12054	0.507661	1.24661e-08	1.39835e-07
FBgn0261625	GLS	0.507504	4.91068e-14	9.86016e-13
FBgn0039226	Ude	0.506627	4.36189e-08	4.55428e-07
FBgn0037625	CG11768	0.506424	0.329612	0.481675
FBgn0083971	CG34135	0.506424	0.329612	0.481675
FBgn0011591	fng	0.506187	0.22922	0.369399
FBgn0033236	CG14764	0.505882	1.22504e-08	1.37896e-07
FBgn0003372	Sgs1	0.505421	0.00108594	0.00445801
FBgn0037814	CG6325	0.504619	4.43144e-09	5.36999e-08
FBgn0037506	Mics1	0.50369	0.0840781	0.170022
FBgn0029881	pigs	0.503069	1.04682e-06	8.67085e-06
FBgn0037924	CG14712	0.502806	5.20836e-07	4.60223e-06
FBgn0004611	Plc21C	0.502648	5.73857e-09	6.84236e-08
FBgn0003862	trx	0.502395	4.31505e-05	0.00026063
FBgn0024995	CG2680	0.502082	0.585243	0.715931
FBgn0000180	bib	0.501502	0.492699	0.6364
FBgn0263120	Acsl	0.501056	1.46723e-06	1.18582e-05
FBgn0021760	chb	0.500425	2.66255e-07	2.45841e-06
FBgn0037327	PEK	0.500082	2.30286e-09	2.87724e-08
FBgn0034498	CG16868	0.500074	6.51693e-10	8.76609e-09
FBgn0259234	Camta	0.500045	4.51355e-07	4.03629e-06
FBgn0034094	Tsf3	0.499994	3.30498e-10	4.60599e-09
FBgn0284228	CG46312	0.49938	6.55846e-08	6.70282e-07
FBgn0015032	Cyp4c3	0.498347	0.72894	0.826266
FBgn0038436	Gyc89Db	0.497253	0.0382251	0.0899776
FBgn0266717	Bruce	0.497151	9.89603e-05	0.000543045
FBgn0004876	cdi	0.496705	3.6699e-07	3.31251e-06
FBgn0023388	Dap160	0.496644	1.11687e-13	2.17037e-12
FBgn0036518	RhoGAP71E	0.496571	2.92029e-09	3.61129e-08
FBgn0001206	Hmr	0.496404	1.98775e-08	2.16373e-07
FBgn0001965	Sos	0.496259	3.27203e-12	5.48633e-11
FBgn0015396	jumu	0.495972	5.3727e-07	4.73013e-06
FBgn0036451	CG9425	0.495763	3.44553e-06	2.61817e-05
FBgn0051612	CG31612	0.495668	0.000639033	0.0028042
FBgn0040273	Spt5	0.495654	8.29188e-13	1.48302e-11
FBgn0040071	tara	0.495376	1.15325e-06	9.47923e-06
FBgn0039633	CG11873	0.494473	9.98809e-08	9.92438e-07
FBgn0038432	CG14883	0.49381	9.79265e-07	8.14621e-06
FBgn0004838	Hrb27C	0.493561	6.12025e-06	4.42767e-05
FBgn0010406	RNaseX25	0.493443	4.93425e-09	5.94202e-08
FBgn0032208	Ufd4	0.492949	1.68878e-06	1.35467e-05
FBgn0027498	CG2061	0.492832	3.39649e-05	0.000209472
FBgn0030719	eIF5	0.492809	9.8825e-08	9.82957e-07
FBgn0033636	tou	0.4923	1.97207e-08	2.15212e-07
FBgn0000256	capu	0.49218	5.02203e-11	7.5432e-10
FBgn0264078	Flo2	0.492123	7.93014e-09	9.22763e-08
FBgn0039637	Ctl2	0.49212	1.27159e-08	1.41813e-07
FBgn0036764	CG5535	0.49112	1.22747e-07	1.19867e-06
FBgn0086367	t	0.490881	0.459598	0.607306
FBgn0038113	CG11668	0.490317	0.796883	0.872497
FBgn0039227	polybromo	0.489741	3.26444e-07	2.96037e-06
FBgn0263005	CG43313	0.488871	4.5496e-05	0.000273429
FBgn0000083	AnxB9	0.48852	2.23352e-12	3.8315e-11
FBgn0031759	lid	0.488458	1.26108e-08	1.40966e-07
FBgn0259171	Pde9	0.488184	2.41883e-05	0.000154198
FBgn0003175	px	0.4879	6.37657e-12	1.03853e-10
FBgn0035626	lin-28	0.487889	0.356197	0.507471
FBgn0005660	Ets21C	0.487385	8.76924e-07	7.37747e-06
FBgn0024189	sns	0.486906	0.779403	0.859744
FBgn0266599	Hsc70-4	0.486874	7.65758e-06	5.43401e-05
FBgn0261549	rdgA	0.485725	1.71126e-05	0.000113046
FBgn0025643	CG3588	0.485638	0.793026	0.869457
FBgn0267912	CanA-14F	0.485585	4.58069e-08	4.77242e-07
FBgn0028902	Tektin-A	0.484769	0.632725	0.755453
FBgn0003525	stg	0.484003	8.18694e-11	1.20349e-09
FBgn0028741	fab1	0.483829	1.36957e-07	1.32141e-06
FBgn0250851	CG33981	0.483829	1.36957e-07	1.32141e-06
FBgn0037248	srl	0.483727	2.06357e-06	1.62428e-05
FBgn0036476	sstn	0.483501	4.89307e-05	0.000291712
FBgn0030683	Mvd	0.482292	1.78152e-05	0.000117127
FBgn0032350	CG6287	0.482201	9.87882e-05	0.000542717
FBgn0036816	Indy	0.48215	9.55699e-06	6.66436e-05
FBgn0032434	CG5421	0.480983	0.680458	0.791219
FBgn0031690	CG7742	0.480874	0.699032	0.804818
FBgn0037757	CG8516	0.48044	7.06653e-10	9.46582e-09
FBgn0037812	CG18545	0.47994	0.00412206	0.0139394
FBgn0036899	tey	0.479825	0.770022	0.85442
FBgn0052451	SPoCk	0.479758	3.5288e-09	4.33603e-08
FBgn0052369	CG32369	0.479678	7.88307e-05	0.000446276
FBgn0262737	mub	0.47959	2.45535e-05	0.000156217
FBgn0261988	Gprk2	0.479228	1.21856e-06	9.95669e-06
FBgn0036574	elg1	0.479158	6.16157e-07	5.3563e-06
FBgn0025686	Amnionless	0.478728	0.77127	0.854822
FBgn0067317	Cby	0.478413	0.421029	0.570708
FBgn0050052	Obp49a	0.478126	0.676272	0.787869
FBgn0259209	Mlp60A	0.478022	0.78568	0.863953
FBgn0027066	Eb1	0.477974	1.21059e-07	1.18339e-06
FBgn0085444	mute	0.477885	7.06903e-05	0.000407112
FBgn0036553	CG17027	0.477385	0.779249	0.85972
FBgn0034184	CG9646	0.477352	7.39093e-11	1.09146e-09
FBgn0002643	mam	0.477238	1.47933e-08	1.63846e-07
FBgn0042206	GstD10	0.47721	0.617899	0.743542
FBgn0034046	tun	0.476261	8.82166e-12	1.41999e-10
FBgn0260003	Dys	0.475814	0.000245012	0.00120978
FBgn0034618	CG9485	0.475799	2.46099e-14	5.025e-13
FBgn0085442	NKAIN	0.475688	1.55214e-11	2.42565e-10
FBgn0052037	CG32037	0.47544	0.774477	0.856183
FBgn0265434	zip	0.475401	7.52184e-14	1.4856e-12
FBgn0051956	Pgant4	0.475389	0.762873	0.848828
FBgn0035344	Cyp4d20	0.475361	3.09505e-08	3.29934e-07
FBgn0262614	pyd	0.475263	6.89434e-07	5.89775e-06
FBgn0039532	Mtl	0.475107	7.38089e-09	8.66156e-08
FBgn0016919	nompB	0.474928	0.373766	0.525437
FBgn0020440	Fak	0.474784	0.000523484	0.00235263
FBgn0035719	tow	0.474412	0.300826	0.449957
FBgn0031738	CG9171	0.473486	7.02199e-05	0.000404644
FBgn0033122	CG17002	0.473453	0.00423658	0.0142866
FBgn0264746	CG44004	0.473416	0.423013	0.572434
FBgn0038721	subdued	0.473156	0.000258622	0.00127242
FBgn0052082	IRSp53	0.473113	2.70701e-05	0.000170432
FBgn0032717	CG10600	0.473056	0.00011686	0.000628066
FBgn0262167	ana1	0.472473	2.54521e-06	1.97443e-05
FBgn0034195	Spn53F	0.472425	0.75566	0.844012
FBgn0033984	Lap1	0.472204	7.32297e-05	0.000418493
FBgn0040508	ACXC	0.471741	0.758197	0.845378
FBgn0052302	CG32302	0.471728	0.778218	0.859171
FBgn0039863	CG1815	0.471144	6.92835e-06	4.94926e-05
FBgn0015371	chn	0.470932	9.43649e-07	7.87026e-06
FBgn0011206	bol	0.470921	0.00913581	0.02753
FBgn0038135	CG8773	0.47045	0.334668	0.486048
FBgn0037098	Wnk	0.470098	2.18891e-05	0.000141531
FBgn0010583	dock	0.469754	1.02087e-07	1.01331e-06
FBgn0029666	CG10803	0.469698	6.92309e-05	0.00039966
FBgn0287217	CR46447	0.469683	0.635934	0.757808
FBgn0262866	S6kII	0.469417	6.28985e-07	5.44332e-06
FBgn0001324	kto	0.469094	3.35626e-08	3.56975e-07
FBgn0029750	CG3323	0.469015	0.00696015	0.0218605
FBgn0003459	stwl	0.469015	0.000340061	0.0016267
FBgn0051220	CG31220	0.468957	0.638339	0.759657
FBgn0004875	enc	0.468228	8.09955e-11	1.19246e-09
FBgn0035346	CG1146	0.467967	2.75612e-08	2.95107e-07
FBgn0032363	Dlg5	0.467674	3.16939e-08	3.37486e-07
FBgn0032955	CG2201	0.46735	3.97285e-05	0.000242081
FBgn0262699	fzr	0.467285	2.88348e-09	3.57034e-08
FBgn0034329	BomS1	0.467241	0.695716	0.802579
FBgn0052686	CG32686	0.467165	0.503413	0.64545
FBgn0032373	Vha100-5	0.467028	0.702986	0.807781
FBgn0030187	Ipod	0.464854	0.622237	0.747272
FBgn0032783	CG10237	0.464427	0.00147929	0.00581955
FBgn0025802	Sbf	0.464367	9.87485e-05	0.000542717
FBgn0035505	Teh2	0.464361	0.571751	0.705863
FBgn0000581	E(Pc)	0.463713	8.6657e-10	1.14648e-08
FBgn0002936	ninaA	0.463058	0.700245	0.805594
FBgn0262477	FoxP	0.462582	0.698237	0.80453
FBgn0002577	m	0.462345	0.000870216	0.00367171
FBgn0036374	Spt20	0.4623	6.34103e-07	5.48269e-06
FBgn0041585	olf186-F	0.46186	1.97944e-08	2.15773e-07
FBgn0023458	Rbcn-3A	0.461848	4.686e-06	3.47332e-05
FBgn0035617	l(3)psg2	0.461741	0.000109385	0.000591182
FBgn0261999	Ca-Ma2d	0.461697	0.381719	0.533832
FBgn0040398	CG14629	0.461331	0.000944917	0.00393665
FBgn0033234	MFS12	0.460609	0.154874	0.275327
FBgn0019990	Gcn2	0.460124	1.80464e-08	1.97835e-07
FBgn0011230	poe	0.46005	7.97292e-06	5.62883e-05
FBgn0038407	CG6126	0.459847	1.32963e-07	1.28932e-06
FBgn0001228	CG4456	0.459617	0.000196521	0.000996851
FBgn0001223	Hsp22	0.459576	0.000233993	0.00116131
FBgn0033252	CG12769	0.458642	0.408957	0.560091
FBgn0036741	anchor	0.458631	0.000115194	0.00062049
FBgn0027620	Acf	0.458325	4.43847e-06	3.30507e-05
FBgn0263601	mib1	0.458234	1.17446e-07	1.15626e-06
FBgn0028953	CG14478	0.458151	3.02624e-06	2.31596e-05
FBgn0033443	CG1698	0.45795	0.693812	0.801344
FBgn0028734	Fmr1	0.457694	1.97943e-11	3.05389e-10
FBgn0000163	baz	0.457693	1.89528e-07	1.79106e-06
FBgn0267488	Mcr	0.457409	3.25637e-05	0.000202121
FBgn0000075	amd	0.45732	0.772372	0.855115
FBgn0259978	vlc	0.456339	2.38852e-05	0.000152467
FBgn0053080	CG33080	0.456019	0.104808	0.202481
FBgn0032167	CG5853	0.455989	4.64402e-05	0.000278665
FBgn0260789	mxc	0.455891	9.74242e-08	9.70024e-07
FBgn0004396	CrebA	0.455785	0.000470587	0.00214955
FBgn0287210	CG46440	0.455688	1.96408e-13	3.71216e-12
FBgn0002914	Myb	0.455441	1.7095e-13	3.25007e-12
FBgn0034296	CG10912	0.454966	0.743957	0.835967
FBgn0051005	qless	0.454604	2.31248e-05	0.000147907
FBgn0051272	CG31272	0.454578	0.661282	0.77725
FBgn0260799	p120ctn	0.454569	0.00160887	0.00623535
FBgn0051523	CG31523	0.454183	1.8988e-06	1.50687e-05
FBgn0004573	5-HT7	0.453974	0.75653	0.844294
FBgn0034530	Rcd6	0.453014	0.269005	0.415091
FBgn0040600	CG13631	0.452865	1.04107e-06	8.63059e-06
FBgn0034304	CG5742	0.452015	2.74455e-07	2.52446e-06
FBgn0032075	Tsp29Fb	0.451696	0.00222109	0.00821259
FBgn0261931	CG42797	0.451021	6.50621e-11	9.69706e-10
FBgn0062978	CG31808	0.450792	0.416108	0.566504
FBgn0085380	CG34351	0.450662	0.0207728	0.0546522
FBgn0034007	ND-51L2	0.450212	0.708421	0.812195
FBgn0004368	Ptp4E	0.450208	5.01487e-08	5.20791e-07
FBgn0003285	rst	0.450171	0.776204	0.85734
FBgn0267795	Frl	0.449602	1.70638e-06	1.36765e-05
FBgn0010825	Gug	0.44924	2.5659e-08	2.75656e-07
FBgn0033830	CG10814	0.448855	0.685978	0.795664
FBgn0001227	Hsp67Ba	0.448497	0.14069	0.255604
FBgn0259735	mtgo	0.447389	5.22508e-05	0.000310546
FBgn0053144	CG33144	0.447324	1.60072e-05	0.000106472
FBgn0025864	Crag	0.447198	4.27047e-10	5.88363e-09
FBgn0039451	CG6420	0.446877	0.000479279	0.00217932
FBgn0026313	X11L	0.446804	6.58778e-11	9.8035e-10
FBgn0027601	pdgy	0.446786	4.01869e-09	4.90057e-08
FBgn0031920	CG6441	0.446495	0.785594	0.863953
FBgn0035903	CG6765	0.445122	0.00741578	0.023074
FBgn0040297	Nhe2	0.444842	5.57445e-05	0.000329804
FBgn0028372	isopeptidase-T-3	0.444729	8.73993e-08	8.75624e-07
FBgn0086359	Invadolysin	0.444489	3.6705e-05	0.000224792
FBgn0032969	CG2528	0.444462	0.695796	0.802579
FBgn0041183	Tep1	0.444421	0.518265	0.659213
FBgn0024291	Sirt1	0.444061	1.02412e-05	7.10558e-05
FBgn0260400	elav	0.443955	6.44731e-05	0.000374433
FBgn0061200	Nup153	0.443898	1.67826e-07	1.60369e-06
FBgn0053858	His1:CG33858	0.443717	0.398487	0.550428
FBgn0025631	moody	0.443569	3.04652e-06	2.32963e-05
FBgn0030018	slpr	0.44329	3.37392e-05	0.000208613
FBgn0262738	norpA	0.443264	0.000213181	0.00106845
FBgn0038198	Npc2b	0.442561	0.00349055	0.0121265
FBgn0003983	Vm34Ca	0.441996	0.504209	0.646099
FBgn0285913	red	0.441821	1.84631e-07	1.75163e-06
FBgn0053147	Hs3st-A	0.441285	0.790627	0.867911
FBgn0032689	CG10413	0.441244	7.62028e-05	0.000432413
FBgn0050502	fa2h	0.440666	0.323181	0.474576
FBgn0033524	Cyp49a1	0.440534	0.785361	0.863953
FBgn0016984	sktl	0.440527	6.77376e-10	9.08624e-09
FBgn0032010	CG8086	0.440506	0.356067	0.507361
FBgn0053928	CG33928	0.440417	0.716946	0.818277
FBgn0026787	Nhe1	0.440272	9.0449e-06	6.33931e-05
FBgn0035101	p130CAS	0.439828	9.36386e-06	6.53913e-05
FBgn0264605	CG43954	0.438815	8.91925e-07	7.47113e-06
FBgn0063485	Lasp	0.438815	8.91925e-07	7.47113e-06
FBgn0014417	CG13397	0.438242	3.00752e-06	2.30484e-05
FBgn0035239	CG18170	0.438031	0.423576	0.572955
FBgn0035240	CG33791	0.438031	0.423576	0.572955
FBgn0033194	Vps13	0.438001	3.38267e-05	0.000208753
FBgn0038968	CG12499	0.437976	0.000788746	0.00335434
FBgn0016794	dos	0.437673	2.883e-11	4.40569e-10
FBgn0003371	sgg	0.437476	2.79419e-05	0.000175692
FBgn0010038	GstD2	0.436944	0.251515	0.395454
FBgn0263864	Dark	0.43675	0.000202108	0.0010225
FBgn0250823	gish	0.436033	0.000274741	0.00134216
FBgn0013813	Dhc98D	0.435963	0.150107	0.268818
FBgn0086251	del	0.435567	0.000814688	0.00345706
FBgn0266487	CG45086	0.435318	0.00307975	0.0108873
FBgn0003044	Pcl	0.434341	5.67116e-07	4.95675e-06
FBgn0035477	CG14982	0.433161	8.63739e-05	0.000483033
FBgn0034691	Synj	0.433124	1.06139e-09	1.38339e-08
FBgn0040294	POSH	0.432962	2.30248e-09	2.87724e-08
FBgn0015402	ksr	0.432803	1.0845e-06	8.97522e-06
FBgn0283451	br	0.432534	8.13225e-07	6.8595e-06
FBgn0259984	kuz	0.432299	5.66926e-06	4.13548e-05
FBgn0016641	PTP-ER	0.432006	6.93955e-07	5.92592e-06
FBgn0033069	eIF3f2	0.431711	0.479659	0.624669
FBgn0265523	Smr	0.431573	5.14026e-08	5.32668e-07
FBgn0000370	crc	0.431353	1.57562e-08	1.73913e-07
FBgn0028886	CG15279	0.431332	0.0320263	0.0778334
FBgn0041710	yellow-f	0.43132	1.46569e-05	9.83032e-05
FBgn0002873	mud	0.431148	0.00011891	0.000638019
FBgn0016926	Pino	0.430958	1.09306e-06	9.03512e-06
FBgn0283712	LIMK1	0.430771	7.99929e-08	8.04762e-07
FBgn0051988	CG31988	0.430457	0.483855	0.628016
FBgn0029131	Debcl	0.430412	1.41512e-05	9.51936e-05
FBgn0005632	faf	0.430117	1.23924e-05	8.46436e-05
FBgn0053806	His3:CG33806	0.429658	0.483723	0.62793
FBgn0054045	CG34045	0.429461	0.0226305	0.0585561
FBgn0038881	CG16791	0.429363	5.76283e-10	7.80609e-09
FBgn0040370	CG13375	0.429112	0.177467	0.304762
FBgn0003117	pnr	0.428706	2.61302e-12	4.43524e-11
FBgn0027529	tapas	0.428637	3.72395e-07	3.35816e-06
FBgn0261986	RASSF8	0.428295	0.000141941	0.00074829
FBgn0030456	CG4332	0.428141	5.40047e-07	4.75025e-06
FBgn0036032	CG16711	0.428028	8.0295e-09	9.32078e-08
FBgn0034643	CG10321	0.427889	7.79307e-08	7.85078e-07
FBgn0265082	Cdep	0.427848	2.28692e-07	2.13196e-06
FBgn0004575	Syn	0.427547	0.60135	0.729261
FBgn0265630	sno	0.42745	1.01676e-06	8.43632e-06
FBgn0004049	yrt	0.427144	1.13966e-05	7.8396e-05
FBgn0022893	Df31	0.426928	6.58969e-13	1.18959e-11
FBgn0267363	JYalpha	0.426144	0.62523	0.749469
FBgn0029155	Men-b	0.425912	4.74861e-10	6.49604e-09
FBgn0028424	JhI-26	0.425818	0.000132636	0.000704619
FBgn0031006	rictor	0.42571	7.33745e-07	6.23264e-06
FBgn0027603	Ulp1	0.425609	6.9307e-05	0.000399861
FBgn0052758	Snx27	0.425343	2.11548e-07	1.9817e-06
FBgn0040382	CG5273	0.425077	7.23746e-05	0.000414833
FBgn0016754	sba	0.424567	9.67472e-09	1.10578e-07
FBgn0051151	wge	0.42395	1.27186e-15	2.85665e-14
FBgn0262855	CG43219	0.423676	0.79125	0.868195
FBgn0016756	Usp47	0.423664	7.24272e-11	1.07121e-09
FBgn0051510	CG31510	0.423436	0.0036645	0.0126399
FBgn0003189	r	0.423035	7.23982e-06	5.16412e-05
FBgn0262656	Myc	0.422781	0.000641581	0.00281143
FBgn0039075	CG4393	0.422714	0.0453734	0.103646
FBgn0262563	CG43103	0.422662	0.00370274	0.0127399
FBgn0014037	Su(Tpl)	0.422632	6.84997e-06	4.90052e-05
FBgn0030631	CG6227	0.422053	0.00076465	0.00325761
FBgn0040290	RecQ4	0.421976	0.000208019	0.00104801
FBgn0015589	Apc	0.421863	2.0486e-08	2.22308e-07
FBgn0010300	brat	0.421835	4.12992e-06	3.09921e-05
FBgn0051231	CG31231	0.421755	0.524014	0.664774
FBgn0010504	kermit	0.421684	4.65429e-10	6.37604e-09
FBgn0034975	enok	0.421541	0.00034611	0.00164829
FBgn0032156	CG13124	0.41996	1.38716e-10	2.00858e-09
FBgn0053208	Mical	0.419853	9.13702e-11	1.33705e-09
FBgn0266521	stai	0.418428	7.8001e-06	5.51489e-05
FBgn0035986	CG4022	0.418261	7.52205e-05	0.000428349
FBgn0053127	CG33127	0.418198	0.292014	0.440254
FBgn0003416	sl	0.417952	0.000655561	0.0028636
FBgn0025625	Sik2	0.417898	0.0174626	0.0473349
FBgn0051158	Efa6	0.417771	1.41628e-08	1.57224e-07
FBgn0039858	CycG	0.417674	1.31702e-05	8.93868e-05
FBgn0033095	chk	0.417047	2.24816e-05	0.000144561
FBgn0266525	CG45092	0.417047	2.24816e-05	0.000144561
FBgn0010042	GstD6	0.416793	0.683258	0.793614
FBgn0030970	CG7326	0.416295	9.42666e-06	6.57823e-05
FBgn0038956	CAH8	0.415471	0.805572	0.879518
FBgn0024222	IKKbeta	0.415284	0.000566752	0.00251896
FBgn0250850	rig	0.415048	3.88443e-07	3.4931e-06
FBgn0023518	trr	0.415037	1.08288e-08	1.2333e-07
FBgn0024277	trio	0.415005	1.19585e-07	1.17254e-06
FBgn0050394	CG30394	0.414907	1.1543e-05	7.92906e-05
FBgn0000633	CG17716	0.414772	0.421541	0.571082
FBgn0036663	CG9674	0.41475	1.95375e-09	2.46658e-08
FBgn0250788	beta-Spec	0.414686	7.64795e-06	5.43117e-05
FBgn0000253	Cam	0.414655	8.1158e-07	6.85161e-06
FBgn0039025	Usp12-46	0.414112	1.09361e-06	9.03512e-06
FBgn0029746	CG15465	0.414001	0.401249	0.553019
FBgn0038504	Sur-8	0.413931	3.12131e-07	2.8493e-06
FBgn0039872	salt	0.413709	0.796745	0.872445
FBgn0263773	fok	0.413352	0.165567	0.289079
FBgn0034300	CG5098	0.413347	2.17456e-05	0.000140763
FBgn0004431	LysX	0.413233	0.606389	0.733434
FBgn0005775	Con	0.413107	0.412716	0.563394
FBgn0030941	wgn	0.412881	4.90856e-07	4.36126e-06
FBgn0283724	Girdin	0.412477	5.06743e-05	0.000301548
FBgn0261618	larp	0.41245	4.46845e-11	6.74317e-10
FBgn0000568	Eip75B	0.412047	5.3325e-06	3.91943e-05
FBgn0033579	CG13229	0.411976	0.00185319	0.00706878
FBgn0266410	CG45050	0.411944	9.63469e-06	6.7137e-05
FBgn0038395	CG10407	0.411888	0.00393217	0.0133721
FBgn0030073	CG10962	0.410782	0.000167107	0.000859382
FBgn0038304	CG12241	0.410706	5.78037e-08	5.93902e-07
FBgn0028425	JhI-21	0.410563	2.4106e-09	3.00021e-08
FBgn0028982	Spt6	0.410317	3.2241e-07	2.92654e-06
FBgn0038202	CG12402	0.410171	0.034593	0.08297
FBgn0038394	CG10264	0.410135	0.224017	0.363196
FBgn0032633	Lrch	0.41001	0.000206141	0.00104073
FBgn0036004	Jarid2	0.409928	2.79293e-08	2.98717e-07
FBgn0043070	MESK2	0.409061	4.39371e-11	6.65117e-10
FBgn0053469	CG33469	0.408893	0.305555	0.45562
FBgn0033051	Strica	0.408887	3.22241e-09	3.96965e-08
FBgn0266411	sima	0.408753	2.88425e-05	0.000180766
FBgn0001612	Grip91	0.408496	2.16553e-05	0.000140273
FBgn0039665	CG2310	0.408197	0.00855101	0.0260769
FBgn0024989	CG3777	0.408043	0.248454	0.391767
FBgn0036872	CG12519	0.40785	0.218609	0.356703
FBgn0032889	CG9331	0.407565	8.19867e-05	0.000461169
FBgn0029944	Dok	0.407147	0.000630639	0.00277229
FBgn0263236	SP1029	0.407003	0.062231	0.133532
FBgn0034313	CG5726	0.406856	7.56046e-07	6.41079e-06
FBgn0039381	SppL	0.406584	1.25963e-08	1.40966e-07
FBgn0003392	shi	0.406392	5.43149e-06	3.98007e-05
FBgn0053861	His1:CG33861	0.406236	0.332042	0.48383
FBgn0010415	Sdc	0.406141	0.000202536	0.00102413
FBgn0034047	CG12970	0.405945	0.621465	0.746438
FBgn0003890	betaTub97EF	0.405346	0.00284741	0.0101853
FBgn0035106	rno	0.405302	7.24304e-05	0.000414907
FBgn0024985	Rilpl	0.405114	1.8711e-06	1.48787e-05
FBgn0031981	Megf8	0.404469	0.000350802	0.0016657
FBgn0028664	VhaM9.7-c	0.403426	3.4588e-05	0.000212997
FBgn0011596	fzo	0.403418	0.465121	0.61276
FBgn0026064	KP78a	0.403182	1.23186e-05	8.41986e-05
FBgn0026063	KP78b	0.403182	1.23186e-05	8.41986e-05
FBgn0034420	CG10737	0.402857	6.80128e-06	4.8729e-05
FBgn0033476	oys	0.402623	0.000352166	0.00167136
FBgn0033744	Dh44-R2	0.401738	0.34666	0.498091
FBgn0287182	l(3)80Fj	0.401402	0.0052414	0.0171831
FBgn0034582	Cht9	0.400545	0.664453	0.779666
FBgn0034140	Lst	0.400327	0.247387	0.390339
FBgn0000317	ck	0.400117	0.00110151	0.00451736
FBgn0040236	c11.1	0.399936	9.65998e-09	1.1054e-07
FBgn0011224	heph	0.399641	0.000235351	0.00116625
FBgn0032348	CG4751	0.399588	2.17221e-07	2.0309e-06
FBgn0053864	His1:CG33864	0.399587	0.128266	0.237499
FBgn0262511	Vha44	0.399512	1.20789e-12	2.1288e-11
FBgn0035802	Pura	0.398964	0.00824846	0.0252981
FBgn0020653	Trxr-1	0.398717	0.000680304	0.00295032
FBgn0013343	Syx1A	0.398519	0.000219409	0.00109568
FBgn0027499	wde	0.398402	0.00155574	0.00607823
FBgn0053554	Nipped-A	0.398249	0.00957241	0.0286401
FBgn0052190	NUCB1	0.397067	8.54231e-13	1.52498e-11
FBgn0031799	Pez	0.396838	1.49878e-06	1.2103e-05
FBgn0011818	oaf	0.396392	5.95996e-05	0.00034928
FBgn0035959	CG4911	0.395922	0.000931701	0.00389203
FBgn0036801	MYPT-75D	0.395686	0.392212	0.544345
FBgn0036446	CG9384	0.395405	0.000708545	0.0030577
FBgn0002878	mus101	0.395378	5.09149e-06	3.75945e-05
FBgn0023510	Rbcn-3B	0.395264	1.86541e-07	1.76629e-06
FBgn0020660	eIF4B	0.39412	0.000811419	0.00344469
FBgn0031053	CG14223	0.393912	0.0936734	0.185846
FBgn0010352	Nc73EF	0.392956	2.92203e-10	4.10188e-09
FBgn0028646	aralar1	0.392777	1.20867e-08	1.36211e-07
FBgn0032026	CG7627	0.392354	1.44803e-06	1.17128e-05
FBgn0035558	CG11357	0.392088	1.10453e-07	1.09187e-06
FBgn0034071	CG8405	0.392075	6.43619e-05	0.000374012
FBgn0000557	eEF1alpha2	0.391997	0.166661	0.290597
FBgn0036534	DCP2	0.391961	0.00156934	0.00612145
FBgn0001105	Gbeta13F	0.391792	8.60755e-05	0.000481923
FBgn0285926	Imp	0.391392	0.012178	0.0349836
FBgn0030300	Sk1	0.391287	0.116966	0.220679
FBgn0031030	Tao	0.390544	5.37219e-07	4.73013e-06
FBgn0264693	ens	0.390516	1.12315e-06	9.25548e-06
FBgn0035229	pns	0.390445	6.39736e-09	7.58107e-08
FBgn0001316	klar	0.390394	7.76951e-09	9.05163e-08
FBgn0036448	mop	0.390081	0.000164442	0.000847936
FBgn0042180	CG18870	0.389741	9.00762e-05	0.000502284
FBgn0037811	CG12592	0.389448	1.10457e-05	7.61995e-05
FBgn0029834	CG5937	0.388739	0.238443	0.380375
FBgn0035676	ssp6	0.388654	0.299029	0.448384
FBgn0000183	BicD	0.388572	2.30987e-05	0.000147838
FBgn0266720	Snap24	0.388114	6.00809e-06	4.35631e-05
FBgn0286203	stw	0.387068	0.000749887	0.00320036
FBgn0051668	CG31668	0.386916	0.689379	0.798303
FBgn0053866	His3:CG33866	0.386577	0.566684	0.701581
FBgn0040784	karr	0.386297	0.782323	0.862016
FBgn0033087	Hsepi	0.386254	7.54723e-05	0.000429277
FBgn0030077	CG15365	0.386137	0.53398	0.673613
FBgn0042085	Bap170	0.386039	0.000118027	0.000633633
FBgn0051108	TTLL5	0.385915	0.000669026	0.00291319
FBgn0015714	Cyp6a17	0.385722	5.05115e-06	3.73252e-05
FBgn0284230	CG46314	0.385528	1.78997e-14	3.68604e-13
FBgn0032820	fbp	0.385029	0.00110663	0.00452876
FBgn0010611	Hmgs	0.38496	1.12485e-09	1.45823e-08
FBgn0002431	hyd	0.384631	0.00110515	0.00452458
FBgn0266719	stac	0.384533	0.00236818	0.00868994
FBgn0035985	Cpr67B	0.383375	0.559901	0.696129
FBgn0261836	Msp300	0.38315	0.000714597	0.00307557
FBgn0283521	lola	0.382933	2.67251e-06	2.06654e-05
FBgn0033166	Eaf	0.382835	1.66696e-07	1.59717e-06
FBgn0262103	Sik3	0.382572	5.0528e-07	4.47706e-06
FBgn0264855	AP-2alpha	0.382176	0.000120152	0.000643692
FBgn0034644	CG10082	0.381261	1.10079e-07	1.08938e-06
FBgn0053801	His1:CG33801	0.381179	0.477197	0.622976
FBgn0034494	CG10444	0.38106	2.87105e-05	0.000180056
FBgn0000351	cort	0.380783	0.103286	0.200028
FBgn0026375	RhoGAPp190	0.380351	7.30594e-05	0.000417767
FBgn0040232	cmet	0.379903	0.00125636	0.00507906
FBgn0267726	CG46059	0.379785	0.306754	0.456702
FBgn0263110	CG43367	0.379264	0.00021668	0.0010843
FBgn0263231	bel	0.379142	6.51721e-12	1.05965e-10
FBgn0035923	CG6511	0.378912	0.00308169	0.0108902
FBgn0085478	Zdhhc8	0.378805	4.93248e-07	4.37848e-06
FBgn0263993	CG43736	0.378711	5.21501e-06	3.84184e-05
FBgn0036772	CG5290	0.378667	3.33532e-05	0.000206623
FBgn0266489	CG45088	0.378554	4.00234e-06	3.01283e-05
FBgn0039855	CG1638	0.378548	0.577475	0.710297
FBgn0053193	sav	0.378475	0.00814976	0.025059
FBgn0034371	Ntan1	0.378426	3.40002e-07	3.08043e-06
FBgn0027558	Pgant3	0.377848	1.31308e-09	1.68864e-08
FBgn0036254	CG5645	0.377491	0.00311239	0.0109746
FBgn0261397	didum	0.377369	0.000101315	0.000553453
FBgn0010786	l(3)02640	0.377325	1.43977e-07	1.38637e-06
FBgn0051613	His3:CG31613	0.377212	0.589474	0.719649
FBgn0263750	CG43675	0.377206	4.75692e-09	5.73649e-08
FBgn0035410	CG14964	0.377191	0.0237184	0.0608617
FBgn0004698	Xpc	0.376837	0.000153261	0.00079666
FBgn0014020	Rho1	0.376187	0.000135582	0.000719085
FBgn0036814	CG14073	0.37614	0.000369911	0.00174785
FBgn0034009	CG8155	0.375902	0.00034978	0.00166176
FBgn0026441	ear	0.375181	1.14486e-07	1.13058e-06
FBgn0030680	CG8944	0.374851	7.90221e-05	0.000447097
FBgn0015279	Pi3K92E	0.374749	3.64847e-05	0.000223727
FBgn0032935	Atg18b	0.374597	1.43025e-06	1.15787e-05
FBgn0025866	CalpB	0.3743	6.77954e-05	0.000391842
FBgn0037792	TAF1B	0.374115	2.54027e-05	0.000161301
FBgn0087013	Karybeta3	0.37365	4.75764e-09	5.73649e-08
FBgn0041092	tai	0.373135	1.67659e-07	1.60369e-06
FBgn0032521	CG7110	0.373048	1.18611e-07	1.16417e-06
FBgn0004583	ex	0.373019	0.00148894	0.00585273
FBgn0058198	CG40198	0.373013	0.725143	0.824072
FBgn0031969	pes	0.3729	4.16801e-06	3.12536e-05
FBgn0034617	Panx	0.372394	0.00022171	0.00110603
FBgn0262838	BomT1	0.371394	0.650119	0.767961
FBgn0037705	mura	0.370856	0.00160302	0.00622517
FBgn0267350	PI4KIIIalpha	0.370815	0.000162823	0.000840037
FBgn0263998	Ack-like	0.370731	2.13264e-05	0.000138328
FBgn0264742	CG44000	0.370644	9.16859e-09	1.05543e-07
FBgn0264743	CG44001	0.370644	9.16859e-09	1.05543e-07
FBgn0034275	CG5002	0.370501	0.737309	0.831884
FBgn0016122	Acer	0.369751	4.249e-05	0.000256962
FBgn0031216	Zir	0.369748	0.0136867	0.0387303
FBgn0030672	CG9281	0.369272	1.27024e-09	1.64011e-08
FBgn0053995	CG33995	0.369176	1.0357e-08	1.18237e-07
FBgn0037336	CG2519	0.369147	9.09795e-05	0.00050557
FBgn0263855	BubR1	0.369111	0.0011759	0.0047794
FBgn0261244	inaE	0.368748	0.000269719	0.00131829
FBgn0037252	CG14650	0.368533	2.9392e-07	2.68814e-06
FBgn0034636	twz	0.368379	0.00383704	0.0131412
FBgn0262560	wcd	0.368259	2.60533e-05	0.000165107
FBgn0037615	CG11760	0.368105	0.00862829	0.0262463
FBgn0085415	CG34386	0.3681	0.354494	0.505723
FBgn0030658	CG7872	0.368069	0.0034078	0.0118689
FBgn0267390	dop	0.367923	7.40695e-08	7.50643e-07
FBgn0029838	CG4666	0.367858	0.746409	0.837728
FBgn0037005	CG5078	0.367622	0.63175	0.754755
FBgn0035969	CG4476	0.367278	0.727477	0.825226
FBgn0040238	Best1	0.366246	4.29235e-05	0.000259421
FBgn0052113	Vps13D	0.36598	0.00677514	0.0213698
FBgn0000524	dx	0.365757	2.0792e-05	0.000135043
FBgn0035400	CG11537	0.365715	5.57952e-09	6.66094e-08
FBgn0262534	CG43088	0.365513	0.00478686	0.0159035
FBgn0263144	bin3	0.36508	1.82537e-05	0.000119765
FBgn0051660	smog	0.364918	5.02531e-05	0.000299226
FBgn0034083	lbk	0.364898	9.68652e-05	0.00053428
FBgn0261444	CG3638	0.364826	1.13384e-06	9.33554e-06
FBgn0260659	CG42542	0.364624	5.51194e-07	4.83948e-06
FBgn0001169	H	0.36428	3.12017e-05	0.000194166
FBgn0027492	wdb	0.36358	0.000451957	0.00207956
FBgn0085370	Pde11	0.363318	5.44827e-05	0.000323413
FBgn0035016	CG4612	0.363314	0.000505573	0.00228276
[truncated: 7,660 more rows]
